# Supplementary material for: Mapping high-impact groups across dietary sustainability and nutrition
Source: Research Square preprint supplement (doi:10.21203/rs.3.rs-7188924/v1), 2025-07-28
Supplement: Supplementary file 2 [file 651e7d7b8183ddd165b9719e.xlsx]

## Sheet: Consumption (gram per 2000kcal)
Age	Gender	Area	Education	Fruits	Non starchy vegetables	Potatoes	Other starchy vegetables	Beans and legumes	Nuts and seeds	Refined grains	Whole grains	Processed meats	Unprocessed red meats	Seafoods	Eggs	Coffee	Tea	Dairy products	Sugar
15-24	Female	Rural	High (12.01+ years)	194.98	178.511	65.8289	48.9896	36.0729	11.4196	297.757	44.4443	27.5488	59.6766	41.7318	25.3191	4.09011	1.42656	319.596	21.3292
15-24	Female	Rural	Low (0-6 years formal)	137.706	150.29	73.3567	37.2792	31.5609	6.87275	273.362	31.3082	26.3019	59.6131	32.0694	20.5085	3.9148	1.42037	228.068	18.5392
15-24	Female	Rural	Medium (6.01-12 years)	160.243	159.825	73.196	41.3801	32.2212	8.48778	275.809	35.4447	27.8691	59.6383	34.9205	22.7581	3.97995	1.41573	263.18	21.8848
15-24	Female	Urban	High (12.01+ years)	241.689	177.79	67.4424	52.2749	37.2379	15.0364	302.741	50.081	33.5658	69.1625	44.198	28.0457	3.9414	1.42965	368.107	25.8963
15-24	Female	Urban	Low (0-6 years formal)	161.052	149.639	73.561	39.6081	32.7663	8.95634	276.614	35.4085	31.0759	69.1625	33.8126	21.4599	3.75651	1.42112	253.604	21.0328
15-24	Female	Urban	Medium (6.01-12 years)	193.111	159.157	74.429	44.027	33.2329	10.8947	279.179	39.8253	33.2291	69.1625	36.8347	24.3607	3.82593	1.41786	297.818	25.8682
15-24	Male	Rural	High (12.01+ years)	177.015	166.71	72.2098	45.5435	36.2577	11.545	301.973	44.0135	32.3752	62.4896	40.5366	25.5209	4.16284	1.39145	306.602	22.4998
15-24	Male	Rural	Low (0-6 years formal)	123.546	139.707	80.3354	34.6668	32.0513	6.97377	278.196	31.0806	31.1754	62.429	31.1908	20.8558	3.98544	1.38578	219.003	19.6453
15-24	Male	Rural	Medium (6.01-12 years)	144.641	148.727	80.2954	38.4396	32.543	8.60728	280.294	35.2249	32.9193	62.4529	33.8943	23.0597	4.05325	1.38093	252.38	23.1437
15-24	Male	Urban	High (12.01+ years)	220.539	165.875	74.0298	48.6159	37.4209	15.1948	306.619	49.5996	38.9782	71.9659	42.9026	28.0616	4.01191	1.39427	352.549	27.2614
15-24	Male	Urban	Low (0-6 years formal)	145.495	139.049	80.9272	36.8515	33.1385	9.06519	281.174	35.2325	36.5359	71.9659	32.8754	21.7767	3.82602	1.38604	243.24	22.2483
15-24	Male	Urban	Medium (6.01-12 years)	175.492	148.074	81.771	40.937	33.5845	11.0256	283.72	39.4764	38.953	71.9659	35.801	24.582	3.89763	1.38331	285.71	27.2713
25-34	Female	Rural	High (12.01+ years)	181.612	191.526	61.83	37.0477	29.8043	11.6227	224.639	43.1193	25.2347	52.4377	38.7067	24.42	7.13693	1.52906	265.176	18.3741
25-34	Female	Rural	Low (0-6 years formal)	131.137	163.435	68.8471	28.2906	26.9296	6.88149	211.239	30.1929	24.6511	52.3904	30.4415	19.8155	6.94441	1.51853	189.634	15.4946
25-34	Female	Rural	Medium (6.01-12 years)	150.935	172.973	68.7397	31.3439	26.9114	8.49826	210.95	34.0664	25.8784	52.4088	32.6824	21.992	7.11158	1.51621	218.08	18.661
25-34	Female	Urban	High (12.01+ years)	221.687	190.825	63.2978	39.4964	30.8414	15.2199	226.097	48.508	30.5195	60.3881	40.8247	26.9831	6.86365	1.53138	303.11	22.7958
25-34	Female	Urban	Low (0-6 years formal)	150.515	162.782	69.4187	30.1312	28.1516	8.94041	211.768	34.2195	28.8722	60.3881	31.9967	20.7351	6.67324	1.5204	210.156	18.0464
25-34	Female	Urban	Medium (6.01-12 years)	178.944	172.331	70.15	33.3957	27.864	11.0305	211.714	38.6191	30.5593	60.3881	34.3962	23.4812	6.83692	1.51952	245.761	22.5611
25-34	Male	Rural	High (12.01+ years)	164.131	178.431	67.9681	34.4382	30.1668	11.7726	229.707	42.6115	29.9467	55.4141	37.6818	24.6298	7.29293	1.49197	254.16	19.3607
25-34	Male	Rural	Low (0-6 years formal)	116.948	151.712	75.8018	26.3776	27.4298	7.02922	216.805	29.9866	29.4907	55.3689	29.6883	20.2059	7.09822	1.48292	182.659	16.4447
25-34	Male	Rural	Medium (6.01-12 years)	135.445	160.771	75.5675	29.1862	27.2624	8.64732	216.059	33.8675	30.8742	55.3868	31.8243	22.3169	7.2867	1.47918	209.815	19.7081
25-34	Male	Urban	High (12.01+ years)	201.661	177.654	69.7859	36.7467	31.1406	15.373	230.4	47.9554	35.8481	63.2601	39.7537	27.0478	7.01338	1.49433	290.512	23.9715
25-34	Male	Urban	Low (0-6 years formal)	135.308	151.066	76.3867	28.0224	28.6384	9.06689	216.598	33.9023	34.1053	63.2601	31.2157	21.0422	6.82508	1.48295	202.096	19.051
25-34	Male	Urban	Medium (6.01-12 years)	161.863	160.022	77.2248	31.0629	28.2419	11.1672	216.533	38.2101	36.2418	63.2601	33.4941	23.728	7.02215	1.48173	236.15	23.8007
35-44	Female	Rural	High (12.01+ years)	171.423	196.348	58.0257	32.6463	26.6492	11.106	192.783	43.0929	22.7362	46.5244	36.8981	23.5255	9.94112	1.58969	239.414	15.2967
35-44	Female	Rural	Low (0-6 years formal)	126.46	168.902	64.5241	24.8703	24.4992	6.57315	182.967	30.1234	22.5342	46.4866	29.3727	18.9143	9.74874	1.57651	170.907	12.5345
35-44	Female	Rural	Medium (6.01-12 years)	144.156	178.288	64.6966	27.5317	24.1601	8.14201	182.123	33.9554	23.5247	46.5014	31.3196	21.0313	9.99465	1.57718	196.813	15.4256
35-44	Female	Urban	High (12.01+ years)	205.492	195.58	59.2981	34.8186	27.6775	14.6985	192.839	48.7261	27.1858	53.5072	38.8479	26.2389	9.63156	1.59293	274.28	19.4582
35-44	Female	Urban	Low (0-6 years formal)	142.702	168.266	64.9537	26.4557	25.7003	8.5319	182.639	34.1336	26.0644	53.5072	30.8476	19.8223	9.44059	1.57811	189.269	14.9875
35-44	Female	Urban	Medium (6.01-12 years)	167.769	177.62	65.723	29.315	25.0633	10.4793	181.533	38.4275	27.4528	53.5072	32.8929	22.5593	9.68062	1.57901	221.481	19.0555
35-44	Male	Rural	High (12.01+ years)	154.233	182.352	63.8044	30.358	26.9737	11.2921	197.635	42.5794	27.1861	49.3679	35.9928	23.7168	10.1619	1.55226	229.288	16.1453
35-44	Male	Rural	Low (0-6 years formal)	112.294	156.393	71.1176	23.1494	24.9478	6.69554	188.441	29.8139	27.1871	49.3319	28.7188	19.2538	9.96986	1.53986	164.662	13.3233
35-44	Male	Rural	Medium (6.01-12 years)	128.648	165.303	71.0508	25.6394	24.4866	8.277	187.123	33.5989	28.2506	49.3462	30.5618	21.3349	10.2075	1.53982	188.838	16.296
35-44	Male	Urban	High (12.01+ years)	186.317	181.636	65.4618	32.3977	27.9843	14.8764	197.377	48.0025	32.1799	56.4278	37.9375	26.2556	9.84181	1.55482	262.861	20.4391
35-44	Male	Urban	Low (0-6 years formal)	127.689	155.749	71.5171	24.6247	26.151	8.64616	187.463	33.7861	30.9798	56.4278	30.1332	20.0908	9.65602	1.5404	181.822	15.8091
35-44	Male	Urban	Medium (6.01-12 years)	151.114	164.578	72.2863	27.2946	25.4604	10.6572	186.525	38.0234	32.7146	56.4278	32.0891	22.7744	9.91671	1.5412	212.259	20.0914
45-54	Female	Rural	High (12.01+ years)	168.279	198.566	56.0457	36.0586	27.4614	10.3761	194.959	45.8938	20.7176	44.4045	37.7329	23.5785	10.6681	1.60949	242.161	12.8259
45-54	Female	Rural	Low (0-6 years formal)	125.711	171.084	62.4624	27.1137	25	6.1695	184.199	31.8961	20.7744	44.3687	30.0447	18.3983	10.4497	1.59398	171.356	10.3426
45-54	Female	Rural	Medium (6.01-12 years)	142.559	180.498	62.5047	30.1367	24.8025	7.60652	183.605	35.9433	21.5629	44.383	32.0152	20.6403	10.7491	1.59522	197.526	12.8456
45-54	Female	Urban	High (12.01+ years)	199.268	197.856	57.0733	38.575	28.654	13.7363	195.059	52.2541	24.4684	51.5016	39.7129	26.8763	10.3547	1.61228	279.76	16.4956
45-54	Female	Urban	Low (0-6 years formal)	140.728	170.456	62.5777	28.8954	26.2807	7.9878	183.698	36.2917	23.7205	51.5016	31.5439	19.4848	10.1534	1.59522	190.721	12.4678
45-54	Female	Urban	Medium (6.01-12 years)	164.126	179.732	63.3702	32.1718	25.8525	9.81544	183.207	40.8305	24.8617	51.5016	33.6341	22.4706	10.4417	1.59815	223.932	16.0142
45-54	Male	Rural	High (12.01+ years)	151.248	184.139	61.6318	33.6034	27.7477	10.5244	199.875	45.2718	24.8651	47.068	36.8255	23.6922	10.9261	1.5722	231.494	13.4879
45-54	Male	Rural	Low (0-6 years formal)	111.62	158.282	68.8101	25.23	25.4413	6.30108	189.492	31.5896	25.1031	47.034	29.4012	18.7035	10.7184	1.55687	164.925	10.9706
45-54	Male	Rural	Medium (6.01-12 years)	127.02	167.117	68.8092	28.0622	25.0494	7.75051	188.331	35.6262	26.0268	47.0477	31.2522	20.8898	11.0054	1.55785	189.77	13.5377
45-54	Male	Urban	High (12.01+ years)	180.132	183.453	62.9112	35.8602	28.7871	13.9056	199.278	51.29	29.0243	54.2194	38.7469	26.7632	10.5947	1.57363	267.073	17.3274
45-54	Male	Urban	Low (0-6 years formal)	125.582	157.604	68.9077	26.9213	26.7417	8.12318	188.633	35.9258	28.3065	54.2194	30.8531	19.7164	10.3937	1.55795	182.99	13.2002
45-54	Male	Urban	Medium (6.01-12 years)	147.411	166.469	69.7579	29.915	26.0498	9.98252	187.757	40.3707	29.6763	54.2194	32.8011	22.5939	10.6902	1.55927	214.666	16.8721
55-64	Female	Rural	High (12.01+ years)	170.246	199.646	55.5323	47.0253	31.5812	9.60467	221.855	51.0591	19.1159	45.6633	40.5477	24.7485	9.69821	1.60167	265.946	10.8969
55-64	Female	Rural	Low (0-6 years formal)	127.795	171.504	62.068	34.6216	27.894	5.73708	206.599	35.305	19.2783	45.6246	32.083	18.3836	9.52985	1.58471	185.187	8.80051
55-64	Female	Rural	Medium (6.01-12 years)	144.63	181.07	61.9829	38.8204	28.1129	7.05939	206.79	39.817	19.982	45.6399	34.2874	20.9384	9.80339	1.58494	214.832	10.876
55-64	Female	Urban	High (12.01+ years)	199.872	198.979	56.2375	50.2393	32.8128	12.7253	222.778	58.5079	22.2769	53.6948	42.7007	29.1963	9.37753	1.60318	311.222	14.0312
55-64	Female	Urban	Low (0-6 years formal)	142.505	170.848	61.8854	36.9715	29.2683	7.45398	206.459	40.3107	21.6948	53.6948	33.6653	19.7915	9.20071	1.58424	207.581	10.5472
55-64	Female	Urban	Medium (6.01-12 years)	165.684	180.486	62.5303	41.5704	29.382	9.16343	207.402	45.4152	22.783	53.6948	36.0394	23.3668	9.46747	1.58936	246.536	13.626
55-64	Male	Rural	High (12.01+ years)	153.021	185.35	61.1509	44.0108	31.6804	9.76188	226.698	50.3607	23.0796	48.1421	39.5622	24.7115	9.94553	1.56441	254.124	11.474
55-64	Male	Rural	Low (0-6 years formal)	113.478	158.651	68.2699	32.3039	28.2679	5.87191	211.957	34.8681	23.333	48.1054	31.344	18.6526	9.75609	1.54815	177.965	9.305
55-64	Male	Rural	Medium (6.01-12 years)	129.054	167.756	68.2996	36.2339	28.3819	7.21336	211.953	39.3209	24.1685	48.1201	33.4814	21.1345	10.0437	1.54921	206.35	11.4973
55-64	Male	Urban	High (12.01+ years)	180.754	184.67	61.9413	47.0353	32.8826	12.9134	227.195	57.4698	26.6212	56.2624	41.6918	28.906	9.62954	1.56474	298.079	14.7303
55-64	Male	Urban	Low (0-6 years formal)	127.221	158.088	68.0612	34.5014	29.603	7.5782	211.706	39.7673	26.0738	56.2624	32.9126	19.9498	9.4329	1.54794	199.415	11.1556
55-64	Male	Urban	Medium (6.01-12 years)	148.765	167.172	68.7629	38.7325	29.4987	9.2874	211.952	44.7227	27.2602	56.2624	35.1593	23.3758	9.71588	1.55085	236.116	14.3568
65+	Female	Rural	High (12.01+ years)	179.029	202.305	55.712	86.9195	44.7056	8.44857	313.394	63.3683	16.5812	53.5364	48.3318	29.9771	7.42251	1.57054	342.824	8.14688
65+	Female	Rural	Low (0-6 years formal)	134.658	172.152	62.195	62.646	37.3957	5.11829	283.409	43.9897	16.8959	53.488	37.5323	19.4744	7.27124	1.55223	229.296	6.52758
65+	Female	Rural	Medium (6.01-12 years)	152.444	182.356	62.3182	70.8763	39.0406	6.27002	287.322	49.6331	17.4401	53.5071	40.529	23.2847	7.45565	1.55493	271.25	8.18796
65+	Female	Urban	High (12.01+ years)	208.153	201.68	55.8489	92.998	46.517	11.2659	318.518	74.963	18.9631	64.7848	51.0246	37.2748	7.18643	1.57306	419.129	10.5795
65+	Female	Urban	Low (0-6 years formal)	149.797	171.837	61.5448	67.0496	39.1999	6.68279	286.118	50.9171	18.7286	64.7848	39.4963	22.1318	6.97891	1.55253	263.657	7.94532
65+	Female	Urban	Medium (6.01-12 years)	173.87	181.855	62.1502	75.8032	40.6346	8.16012	290.882	56.9308	19.4933	64.7848	42.6716	27.8254	7.24386	1.55764	320.98	10.2423
65+	Male	Rural	High (12.01+ years)	160.862	187.969	61.3766	81.9242	44.5114	8.62904	318.441	62.4665	20.1658	55.7231	47.0891	29.6026	7.63415	1.53607	328.174	8.57845
65+	Male	Rural	Low (0-6 years formal)	119.52	159.557	68.5542	59.0466	37.3926	5.22383	288.89	43.573	20.6038	55.6776	36.6206	19.5688	7.4387	1.51746	219.819	6.92053
65+	Male	Rural	Medium (6.01-12 years)	136.175	169.136	68.5066	66.6635	38.9916	6.41435	292.484	49.04	21.2914	55.6953	39.4704	23.2182	7.70817	1.5195	259.726	8.61898
65+	Male	Urban	High (12.01+ years)	188.12	187.298	61.503	87.7387	46.1317	11.4599	322.013	73.2591	22.8254	67.0388	49.7187	36.5889	7.36507	1.53684	399.998	11.0696
65+	Male	Urban	Low (0-6 years formal)	133.802	159.054	67.5264	63.0831	39.0743	6.78145	290.7	49.9526	22.5315	67.0388	38.5242	22.0629	7.22342	1.51582	252.234	8.35227
65+	Male	Urban	Medium (6.01-12 years)	156.081	168.671	68.4147	71.3059	40.5165	8.30115	295.021	55.8827	23.4864	67.0388	41.5536	27.4468	7.44647	1.52127	306.563	10.7836

## Sheet: GHGE (kg CO2-eq per 2000 kcal)
Age	Gender	Area	Education	Beans and legumes	Coffee	Eggs	Fruits	Non starchy vegetables	Nuts and seeds	Other starchy vegetables	Potatoes	Refined grains	Sugar	Tea	Dairy products	Processed meats	Seafoods	Unprocessed red meats	Whole grains
15-24	Female	Rural	High (12.01+ years)	0.195777	0.0711822	0.13053	0.124594	0.113074	0.0315159	0.0587979	0.0200369	0.658459	0.0423971	0.00220926	0.71744	0.485689	0.0172465	1.58755	0.085402
15-24	Female	Rural	Low (0-6 years formal)	0.164298	0.0681554	0.0985328	0.0846525	0.0918936	0.0180862	0.0442209	0.0222464	0.584462	0.037137	0.00219934	0.477344	0.447593	0.013286	1.58443	0.0595735
15-24	Female	Rural	Medium (6.01-12 years)	0.172456	0.0692686	0.112295	0.100971	0.0986996	0.0226076	0.0494112	0.0226322	0.599636	0.0433673	0.002193	0.569218	0.4802	0.0144961	1.58566	0.0683988
15-24	Female	Urban	High (12.01+ years)	0.199489	0.0685928	0.150821	0.15695	0.111924	0.0438995	0.0623748	0.0232285	0.677784	0.0508533	0.00221578	0.865667	0.608927	0.0184049	1.91865	0.099565
15-24	Female	Urban	Low (0-6 years formal)	0.167847	0.0653949	0.105909	0.100472	0.0909527	0.0248395	0.0467445	0.0249576	0.598772	0.0419878	0.00220249	0.548452	0.547467	0.0141169	1.91865	0.069601
15-24	Female	Urban	Medium (6.01-12 years)	0.1752	0.0665844	0.124116	0.123531	0.0977101	0.0306637	0.0522691	0.0257444	0.614853	0.0507708	0.00219823	0.669573	0.591369	0.0154027	1.91865	0.0789725
15-24	Male	Rural	High (12.01+ years)	0.194022	0.0724371	0.129471	0.113925	0.10764	0.0318058	0.0549489	0.0218525	0.660678	0.0445328	0.00215018	0.682895	0.558785	0.0166778	1.63407	0.0846639
15-24	Male	Rural	Low (0-6 years formal)	0.164498	0.0693744	0.0988637	0.0766283	0.0870578	0.0183134	0.0413849	0.0242034	0.58786	0.0391277	0.00214091	0.455253	0.518521	0.0128608	1.63109	0.059308
15-24	Male	Rural	Medium (6.01-12 years)	0.171855	0.0705346	0.112133	0.0919298	0.0936055	0.0228645	0.0461562	0.0246552	0.602495	0.0456433	0.00213454	0.541999	0.554361	0.0139977	1.63227	0.0682082
15-24	Male	Urban	High (12.01+ years)	0.197789	0.0698089	0.148617	0.143967	0.106444	0.0443959	0.0583988	0.0254108	0.678956	0.0533673	0.00215633	0.822828	0.694722	0.0177934	1.96346	0.0986779
15-24	Male	Urban	Low (0-6 years formal)	0.167141	0.0665978	0.105968	0.0914524	0.0861686	0.0251276	0.0437801	0.0273574	0.60195	0.0441819	0.00214377	0.522623	0.63152	0.0136604	1.96346	0.069396
15-24	Male	Urban	Medium (6.01-12 years)	0.174538	0.0678239	0.123439	0.113062	0.0926447	0.031003	0.0489184	0.0280601	0.617412	0.0533102	0.00214023	0.637902	0.680808	0.0149009	1.96346	0.0784515
25-34	Female	Rural	High (12.01+ years)	0.15714	0.124167	0.124038	0.114782	0.115263	0.0328657	0.0440927	0.0187245	0.475061	0.0363251	0.00236491	0.582506	0.435221	0.0160049	1.32829	0.0809766
25-34	Female	Rural	Low (0-6 years formal)	0.135634	0.120848	0.0936251	0.0795052	0.0946048	0.0185256	0.0332413	0.0207767	0.432422	0.0310183	0.00234835	0.38951	0.410303	0.0126337	1.32597	0.0557374
25-34	Female	Rural	Medium (6.01-12 years)	0.139858	0.123737	0.106807	0.0938149	0.101216	0.0231384	0.0370641	0.0211458	0.439032	0.0368239	0.0023456	0.462068	0.435226	0.0135857	1.32687	0.0638251
25-34	Female	Urban	High (12.01+ years)	0.160519	0.119405	0.143294	0.142821	0.114196	0.0454979	0.0467754	0.0215969	0.484731	0.044519	0.00237032	0.697179	0.54489	0.0170087	1.59401	0.0945415
25-34	Female	Urban	Low (0-6 years formal)	0.139124	0.116125	0.100726	0.0928783	0.093721	0.0253548	0.035243	0.0233486	0.438942	0.0358957	0.00235329	0.445816	0.498592	0.013369	1.59401	0.0654525
25-34	Female	Urban	Medium (6.01-12 years)	0.142612	0.118952	0.117913	0.113335	0.100324	0.031731	0.0393519	0.0239819	0.446023	0.0439889	0.00235266	0.541085	0.53297	0.0144005	1.59401	0.074814
25-34	Male	Rural	High (12.01+ years)	0.156545	0.126881	0.123233	0.104644	0.109555	0.0331763	0.0412196	0.0205642	0.4799	0.0381112	0.00230241	0.554527	0.504578	0.0155111	1.37635	0.0802421
25-34	Male	Rural	Low (0-6 years formal)	0.135873	0.123519	0.094252	0.0716563	0.0896128	0.0188423	0.0311206	0.0227375	0.438472	0.0327152	0.00228838	0.372821	0.478822	0.0122574	1.37413	0.0556048
25-34	Male	Rural	Medium (6.01-12 years)	0.139538	0.126779	0.106824	0.0850674	0.0960267	0.0234818	0.0346707	0.0230869	0.444335	0.0386923	0.00228366	0.4415	0.507161	0.0131603	1.37501	0.0636978
25-34	Male	Urban	High (12.01+ years)	0.159542	0.122014	0.141346	0.130835	0.108489	0.0458797	0.0437859	0.0236919	0.488126	0.0466994	0.00230842	0.663307	0.627783	0.0164855	1.63846	0.0936159
25-34	Male	Urban	Low (0-6 years formal)	0.139002	0.118755	0.100815	0.0842883	0.0887456	0.0256649	0.0329764	0.025478	0.443814	0.0376967	0.00229092	0.425884	0.576603	0.012981	1.63846	0.0649607
25-34	Male	Urban	Medium (6.01-12 years)	0.142282	0.122165	0.117478	0.10342	0.0950072	0.0320678	0.0367726	0.0262879	0.451005	0.0462423	0.00228937	0.516326	0.619539	0.0139508	1.63846	0.0741898
35-44	Female	Rural	High (12.01+ years)	0.138963	0.173054	0.120075	0.107183	0.113996	0.0319356	0.0388875	0.0173872	0.400317	0.0302579	0.00245669	0.524422	0.386065	0.0152658	1.15922	0.0796832
35-44	Female	Rural	Low (0-6 years formal)	0.121346	0.169675	0.0890794	0.0757777	0.0940237	0.0179673	0.0291414	0.0192308	0.36862	0.0251696	0.00243619	0.34954	0.369108	0.0122023	1.15736	0.054685
35-44	Female	Rural	Medium (6.01-12 years)	0.124207	0.17399	0.102091	0.08858	0.100417	0.0225462	0.0325571	0.0196654	0.372629	0.0304815	0.002438	0.415546	0.389318	0.01303	1.15809	0.0624407
35-44	Female	Urban	High (12.01+ years)	0.142517	0.167659	0.140722	0.131181	0.112933	0.0446159	0.0413416	0.0199133	0.406275	0.0378243	0.00246418	0.629605	0.478813	0.0161818	1.39046	0.0939244
35-44	Female	Urban	Low (0-6 years formal)	0.12495	0.164301	0.0963229	0.0871184	0.0932254	0.0245592	0.0309018	0.0215365	0.372506	0.0298343	0.00244063	0.400142	0.443702	0.0128953	1.39046	0.0642956
35-44	Female	Urban	Medium (6.01-12 years)	0.126956	0.168512	0.11367	0.105209	0.0995608	0.0306872	0.0345133	0.0221508	0.376523	0.0370479	0.00244354	0.486142	0.472001	0.0137749	1.39046	0.0733493
35-44	Male	Rural	High (12.01+ years)	0.13858	0.176901	0.119074	0.0973481	0.108328	0.0323881	0.0363474	0.0190677	0.405897	0.031778	0.00239391	0.49877	0.451108	0.0148155	1.20473	0.0789927
35-44	Male	Rural	Low (0-6 years formal)	0.121519	0.173544	0.089404	0.0680044	0.0891238	0.0182427	0.0272483	0.0211211	0.374822	0.0265823	0.00237477	0.334632	0.434746	0.0118683	1.20297	0.0542012
35-44	Male	Rural	Medium (6.01-12 years)	0.12384	0.177704	0.102101	0.0799165	0.0952682	0.0228423	0.0304637	0.0214712	0.378543	0.0320051	0.00237568	0.396065	0.457248	0.0126462	1.20367	0.0620165
35-44	Male	Urban	High (12.01+ years)	0.141725	0.171332	0.138424	0.119911	0.107346	0.0450201	0.0386772	0.0218925	0.410488	0.0396584	0.00240034	0.599447	0.555905	0.0157306	1.43556	0.0927218
35-44	Male	Urban	Low (0-6 years formal)	0.124926	0.168064	0.0962371	0.0787785	0.0883647	0.0248819	0.0288929	0.0235246	0.377886	0.0313022	0.00237756	0.382026	0.515298	0.0125409	1.43556	0.0637038
35-44	Male	Urban	Medium (6.01-12 years)	0.126646	0.172629	0.113112	0.0956717	0.0943858	0.0310883	0.0323026	0.0242578	0.382337	0.0389004	0.00237998	0.462858	0.550736	0.0133754	1.43556	0.0728097
45-54	Female	Rural	High (12.01+ years)	0.144791	0.18569	0.123499	0.104677	0.114258	0.0301334	0.0435843	0.0165725	0.408659	0.0254738	0.0024872	0.538845	0.349024	0.0155887	1.13416	0.084602
45-54	Female	Rural	Low (0-6 years formal)	0.125081	0.181875	0.0876517	0.07498	0.0943827	0.0169885	0.0322313	0.0184473	0.373691	0.0208935	0.00246279	0.354209	0.337688	0.0124745	1.1324	0.0576748
45-54	Female	Rural	Medium (6.01-12 years)	0.128631	0.187102	0.101925	0.0871311	0.100728	0.0212183	0.0361474	0.0187451	0.379014	0.0254992	0.00246553	0.422503	0.354212	0.013307	1.1331	0.0658265
45-54	Female	Urban	High (12.01+ years)	0.149162	0.180225	0.148968	0.126416	0.11325	0.0420563	0.0465479	0.0187958	0.414829	0.0320324	0.00249343	0.655446	0.42748	0.016524	1.37656	0.100941
45-54	Female	Urban	Low (0-6 years formal)	0.129182	0.176692	0.0964197	0.0854405	0.0935517	0.0232395	0.034269	0.0203901	0.377871	0.0249139	0.00246729	0.408792	0.400039	0.0131763	1.37656	0.068241
45-54	Female	Urban	Medium (6.01-12 years)	0.132175	0.18173	0.1161	0.102295	0.0998169	0.0289792	0.0384929	0.0210088	0.383574	0.0312273	0.00247232	0.499776	0.423961	0.0140739	1.37656	0.0777627
45-54	Male	Rural	High (12.01+ years)	0.144055	0.190176	0.121932	0.094902	0.108371	0.0304411	0.040835	0.0181224	0.413985	0.0266686	0.00242416	0.512213	0.40826	0.0151483	1.17619	0.0835651
45-54	Male	Rural	Low (0-6 years formal)	0.124935	0.186541	0.0878027	0.0672285	0.0893877	0.0172688	0.0301431	0.0201482	0.380369	0.0220194	0.00240046	0.338998	0.397474	0.0121416	1.17452	0.0572426
45-54	Male	Rural	Medium (6.01-12 years)	0.127834	0.191568	0.101521	0.0784393	0.095426	0.0215361	0.0338235	0.020501	0.384052	0.0267394	0.002403	0.403394	0.416815	0.012921	1.1752	0.0654774
45-54	Male	Urban	High (12.01+ years)	0.147389	0.18441	0.145702	0.11525	0.10745	0.0424564	0.0435046	0.0206997	0.418542	0.0335627	0.00242854	0.621767	0.496119	0.0160551	1.41744	0.0989867
45-54	Male	Urban	Low (0-6 years formal)	0.128992	0.180889	0.0960403	0.0770447	0.088532	0.0235682	0.0320536	0.0223746	0.383675	0.0262546	0.00240421	0.389776	0.467316	0.0128248	1.41744	0.0677622
45-54	Male	Urban	Medium (6.01-12 years)	0.131089	0.186077	0.114816	0.0927952	0.0945836	0.0294138	0.0359264	0.0229942	0.388206	0.0327553	0.00240716	0.47604	0.495529	0.0136513	1.41744	0.0771137
55-64	Female	Rural	High (12.01+ years)	0.170098	0.168707	0.135211	0.105816	0.116052	0.0279203	0.058451	0.0161083	0.477118	0.0217622	0.00247555	0.609423	0.321035	0.0167214	1.23251	0.0945282
55-64	Female	Rural	Low (0-6 years formal)	0.143188	0.165776	0.0897122	0.0762606	0.0956185	0.0158402	0.0421789	0.0181129	0.429853	0.0178905	0.00244949	0.391059	0.312262	0.0132806	1.23061	0.0642298
55-64	Female	Rural	Medium (6.01-12 years)	0.14919	0.170539	0.106812	0.0883872	0.10213	0.0197398	0.0476897	0.0183395	0.437484	0.0217065	0.00245071	0.471314	0.326877	0.0142209	1.23136	0.0733229
55-64	Female	Urban	High (12.01+ years)	0.174948	0.163109	0.170064	0.126491	0.115067	0.03908	0.0624938	0.018244	0.486164	0.027406	0.00248031	0.755866	0.388196	0.0177368	1.52109	0.113799
55-64	Female	Urban	Low (0-6 years formal)	0.148028	0.160041	0.101257	0.0864805	0.0947486	0.0217508	0.0449791	0.0199168	0.435747	0.0211981	0.00245065	0.456659	0.364356	0.0140339	1.52109	0.0765013
55-64	Female	Urban	Medium (6.01-12 years)	0.15416	0.164685	0.125812	0.103079	0.101288	0.0271587	0.0509599	0.0204183	0.445142	0.0267188	0.00245957	0.567368	0.386753	0.0150468	1.52109	0.0873044
55-64	Male	Rural	High (12.01+ years)	0.168462	0.173028	0.132572	0.095917	0.110262	0.0282605	0.0547886	0.0176913	0.481708	0.0228305	0.00241263	0.579295	0.377389	0.0162457	1.27011	0.0934605
55-64	Male	Rural	Low (0-6 years formal)	0.142593	0.169719	0.0896872	0.068376	0.0905652	0.0161394	0.0395537	0.0197415	0.436025	0.0188024	0.00238739	0.373642	0.368251	0.0129169	1.26831	0.063551
55-64	Male	Rural	Medium (6.01-12 years)	0.148276	0.174742	0.105965	0.0796549	0.0968392	0.0200861	0.0447646	0.0201107	0.443054	0.0228457	0.00239028	0.450097	0.385135	0.0138118	1.26903	0.0726251
55-64	Male	Urban	High (12.01+ years)	0.172628	0.167513	0.165236	0.11535	0.109242	0.0395721	0.05855	0.0200191	0.489785	0.0286938	0.00241555	0.719197	0.453373	0.0172402	1.55822	0.111852
55-64	Male	Urban	Low (0-6 years formal)	0.146987	0.164077	0.100339	0.0779703	0.0897895	0.0220552	0.0421328	0.0217364	0.441232	0.0223227	0.00238978	0.436039	0.428943	0.0136525	1.55822	0.0756616
55-64	Male	Urban	Medium (6.01-12 years)	0.152178	0.169018	0.123637	0.0934325	0.0959882	0.0274777	0.0477018	0.0223173	0.449287	0.028056	0.00239476	0.540052	0.45239	0.014609	1.55822	0.0862186
65+	Female	Rural	High (12.01+ years)	0.252262	0.128992	0.181026	0.111442	0.120938	0.0245278	0.116897	0.0157439	0.712973	0.0164482	0.00242904	0.843266	0.276967	0.0198589	1.64278	0.118589
65+	Female	Rural	Low (0-6 years formal)	0.202378	0.12643	0.101944	0.0806796	0.0988852	0.0141466	0.0817663	0.0176672	0.624111	0.0133874	0.00240059	0.509519	0.272624	0.0154688	1.6404	0.0813229
65+	Female	Rural	Medium (6.01-12 years)	0.217219	0.129606	0.129163	0.0934089	0.105977	0.0175305	0.0937653	0.0179984	0.643207	0.0165322	0.00240558	0.631821	0.284059	0.0167314	1.64134	0.0926849
65+	Female	Urban	High (12.01+ years)	0.259908	0.124917	0.242137	0.131496	0.119875	0.0346384	0.12508	0.0175245	0.734797	0.0209168	0.00243518	1.1053	0.329255	0.0211226	2.08866	0.148576
65+	Female	Urban	Low (0-6 years formal)	0.209956	0.121321	0.123363	0.0910087	0.0981154	0.0195427	0.0877866	0.0192867	0.639206	0.0161505	0.00240303	0.617302	0.313682	0.016391	2.08866	0.0990881
65+	Female	Urban	Medium (6.01-12 years)	0.223608	0.125903	0.164975	0.108062	0.105045	0.0242496	0.100559	0.0197447	0.660317	0.0203267	0.00241199	0.793907	0.329416	0.0177382	2.08866	0.111239
65+	Male	Rural	High (12.01+ years)	0.248463	0.132676	0.175286	0.100915	0.114575	0.0249719	0.110246	0.0172512	0.716313	0.0172542	0.0023698	0.80262	0.327528	0.0192697	1.6713	0.11689
65+	Male	Rural	Low (0-6 years formal)	0.199928	0.129317	0.100638	0.0722131	0.093616	0.0143798	0.0769618	0.0193569	0.629182	0.014134	0.00234133	0.485949	0.323908	0.0150203	1.66907	0.0807365
65+	Male	Rural	Medium (6.01-12 years)	0.213617	0.133978	0.126385	0.0841779	0.10032	0.0178274	0.0881197	0.019603	0.647509	0.0173408	0.00234543	0.60178	0.337489	0.0162248	1.66994	0.0916893
65+	Male	Urban	High (12.01+ years)	0.255666	0.12801	0.233361	0.119677	0.113594	0.0351927	0.118027	0.0192047	0.734838	0.0218145	0.0023735	1.04886	0.386511	0.0204921	2.11381	0.14496
65+	Male	Urban	Low (0-6 years formal)	0.206313	0.125579	0.12065	0.0819196	0.0926869	0.0197601	0.0824778	0.0209172	0.642072	0.0169029	0.00234105	0.587659	0.367711	0.0159113	2.11381	0.0971418
65+	Male	Urban	Medium (6.01-12 years)	0.220349	0.12942	0.159865	0.0978686	0.0994531	0.0245753	0.0945711	0.0215225	0.662686	0.0213242	0.0023508	0.753843	0.387328	0.0172025	2.11381	0.109397

## Sheet: Water use (M3 per 2000 kcal)
Age	Gender	Area	Education	Beans and legumes	Coffee	Eggs	Fruits	Non starchy vegetables	Nuts and seeds	Other starchy vegetables	Potatoes	Refined grains	Sugar	Tea	Dairy products	Processed meats	Unprocessed red meats	Whole grains
15-24	Female	Rural	High (12.01+ years)	0.10518	0.0445178	0.0968928	0.181364	0.0458865	0.053462	0.06233	0.0212709	0.606667	0.0285996	0.0236404	0.391071	0.249626	0.784048	0.0873635
15-24	Female	Rural	Low (0-6 years formal)	0.0894913	0.0425339	0.0754037	0.124083	0.0386342	0.0325578	0.04706	0.0237394	0.548495	0.0246357	0.0235309	0.26387	0.236594	0.782308	0.0617954
15-24	Female	Rural	Medium (6.01-12 years)	0.0930077	0.0432669	0.0851327	0.147851	0.0411048	0.0400493	0.0524277	0.0237264	0.556901	0.0291733	0.023461	0.312712	0.250657	0.782997	0.0702552
15-24	Female	Urban	High (12.01+ years)	0.108072	0.042905	0.110508	0.228391	0.0457645	0.0709359	0.0665951	0.02319	0.620548	0.0351011	0.0236819	0.467699	0.3105	0.936791	0.0994585
15-24	Female	Urban	Low (0-6 years formal)	0.0922239	0.0408251	0.0804613	0.147692	0.0385217	0.0426347	0.0500401	0.0251212	0.558349	0.0281957	0.0235404	0.302015	0.285719	0.936791	0.0708387
15-24	Female	Urban	Medium (6.01-12 years)	0.0954268	0.0416006	0.0932234	0.181037	0.0409938	0.0516709	0.0558282	0.0255431	0.566917	0.0347948	0.0234887	0.365738	0.306202	0.936791	0.0798174
15-24	Male	Rural	High (12.01+ years)	0.10551	0.0453094	0.0969475	0.165133	0.0428176	0.0541158	0.058243	0.0233023	0.613213	0.0300892	0.0230371	0.372931	0.290834	0.808747	0.0867377
15-24	Male	Rural	Low (0-6 years formal)	0.090565	0.043303	0.0762705	0.11176	0.0358874	0.033057	0.0440066	0.0259523	0.556184	0.0260058	0.0229417	0.251973	0.278222	0.807087	0.0615792
15-24	Male	Rural	Medium (6.01-12 years)	0.0936876	0.0440672	0.0857399	0.133933	0.0382215	0.0406368	0.0489535	0.0260296	0.563942	0.0307447	0.0228651	0.298187	0.293702	0.807742	0.0700608
15-24	Male	Urban	High (12.01+ years)	0.108317	0.0436747	0.109643	0.208831	0.0426565	0.0716954	0.0621951	0.0254512	0.626218	0.0368518	0.0230743	0.445288	0.358671	0.960938	0.0987858
15-24	Male	Urban	Low (0-6 years formal)	0.0929713	0.0415775	0.081193	0.133783	0.0357698	0.0431958	0.0467766	0.0276828	0.565454	0.0297034	0.0229428	0.288147	0.334441	0.960938	0.070735
15-24	Male	Urban	Medium (6.01-12 years)	0.0961141	0.0423801	0.0934416	0.164922	0.0381041	0.0523277	0.0521315	0.0280043	0.574043	0.0365723	0.0228965	0.348763	0.357049	0.960938	0.0793818
25-34	Female	Rural	High (12.01+ years)	0.0858817	0.0774097	0.0927335	0.167459	0.0492194	0.0545075	0.0466534	0.0199057	0.447605	0.0246211	0.0253382	0.318639	0.226617	0.662226	0.0838403
25-34	Female	Rural	Low (0-6 years formal)	0.0750935	0.0752217	0.0722238	0.116974	0.0420356	0.0326311	0.0353355	0.0222275	0.414466	0.0205874	0.0251602	0.215995	0.220133	0.66093	0.058826
25-34	Female	Rural	Medium (6.01-12 years)	0.0766833	0.0770686	0.0815793	0.13801	0.0445056	0.0401338	0.0392866	0.0222262	0.416498	0.0248525	0.0251238	0.254758	0.230635	0.661434	0.0666611
25-34	Female	Urban	High (12.01+ years)	0.0883687	0.0744651	0.105676	0.208313	0.0491062	0.0718292	0.049759	0.0216346	0.452998	0.0308922	0.0253618	0.378147	0.280754	0.786926	0.0952889
25-34	Female	Urban	Low (0-6 years formal)	0.0778316	0.0722924	0.0771146	0.137088	0.0419166	0.0425881	0.0375997	0.0236008	0.417617	0.0241919	0.0251819	0.246381	0.263814	0.786926	0.0675727
25-34	Female	Urban	Medium (6.01-12 years)	0.0789128	0.0741061	0.0892083	0.16673	0.0443902	0.0524163	0.0418527	0.0239117	0.42026	0.0303199	0.0251733	0.296502	0.27941	0.786926	0.076596
25-34	Male	Rural	High (12.01+ years)	0.0866582	0.0791062	0.0929153	0.152028	0.0458701	0.0552272	0.0435808	0.0219082	0.456212	0.025863	0.0246991	0.303705	0.266403	0.688058	0.0830862
25-34	Male	Rural	Low (0-6 years formal)	0.0762162	0.0768876	0.0732946	0.104926	0.0390373	0.0333451	0.0330847	0.0244518	0.423911	0.0217587	0.0245496	0.206988	0.260867	0.686819	0.0586308
25-34	Male	Rural	Medium (6.01-12 years)	0.0774429	0.0789721	0.0822816	0.124439	0.0413729	0.0408505	0.0367577	0.0244141	0.425209	0.0261512	0.0244927	0.243679	0.27286	0.687309	0.066487
25-34	Male	Urban	High (12.01+ years)	0.0889485	0.0760866	0.105033	0.190046	0.0457284	0.07262	0.046506	0.0238342	0.460137	0.0324052	0.0247347	0.360514	0.327974	0.810925	0.0945821
25-34	Male	Urban	Low (0-6 years formal)	0.078836	0.073946	0.0777956	0.123779	0.0389234	0.043241	0.0351631	0.0259201	0.425679	0.0254343	0.0245441	0.235568	0.309572	0.810925	0.0672025
25-34	Male	Urban	Medium (6.01-12 years)	0.0796772	0.0761219	0.0895472	0.151336	0.0412365	0.0530664	0.0391315	0.0263063	0.428359	0.0318926	0.024526	0.28322	0.329433	0.810925	0.0760315
35-44	Female	Rural	High (12.01+ years)	0.0763645	0.107569	0.0894616	0.156721	0.0504217	0.0521817	0.0409022	0.0185153	0.380592	0.0205563	0.0263532	0.286576	0.202788	0.57814	0.0829181
35-44	Female	Rural	Low (0-6 years formal)	0.0677024	0.105431	0.0686583	0.111696	0.0434156	0.0312366	0.0308518	0.02064	0.355826	0.0167187	0.0261312	0.193784	0.199781	0.577105	0.0580788
35-44	Female	Rural	Medium (6.01-12 years)	0.0684327	0.108091	0.0778304	0.130632	0.045845	0.0384869	0.0343002	0.0207262	0.35626	0.0206091	0.0261481	0.228907	0.208163	0.577512	0.0657137
35-44	Female	Urban	High (12.01+ years)	0.0788462	0.104243	0.10319	0.191909	0.0502713	0.0695805	0.0436075	0.0200284	0.382872	0.026392	0.0264011	0.34137	0.248566	0.686839	0.0948358
35-44	Female	Urban	Low (0-6 years formal)	0.0703881	0.102114	0.073575	0.128995	0.043303	0.0407313	0.03281	0.021892	0.357007	0.0201614	0.026151	0.221036	0.236632	0.686839	0.0667268
35-44	Female	Urban	Medium (6.01-12 years)	0.0705209	0.10471	0.0856867	0.15529	0.045724	0.0498527	0.0365196	0.0221678	0.357074	0.0256645	0.0261735	0.26635	0.249399	0.686839	0.0753763
35-44	Male	Rural	High (12.01+ years)	0.0770218	0.109949	0.0894432	0.141729	0.0468305	0.0530483	0.0382161	0.020383	0.388936	0.0216209	0.025716	0.273216	0.24017	0.602498	0.0822451
35-44	Male	Rural	Low (0-6 years formal)	0.0687223	0.107805	0.0694655	0.0998225	0.0402215	0.0318108	0.0288703	0.0227663	0.36528	0.0176835	0.0255055	0.185626	0.239113	0.601513	0.0576921
35-44	Male	Rural	Medium (6.01-12 years)	0.0691113	0.110383	0.0784464	0.11726	0.0425288	0.0391669	0.0320806	0.0227677	0.364973	0.0216715	0.0255118	0.218459	0.247791	0.601904	0.0652701
35-44	Male	Urban	High (12.01+ years)	0.0794156	0.106492	0.102251	0.174671	0.0467089	0.0704328	0.0407702	0.022105	0.39038	0.0276643	0.02575	0.32535	0.292402	0.710904	0.0937554
35-44	Male	Urban	Low (0-6 years formal)	0.0713485	0.104428	0.0740854	0.116053	0.0400946	0.0412698	0.0306855	0.0240258	0.365196	0.0211737	0.025502	0.211146	0.278984	0.710904	0.0663051
35-44	Male	Urban	Medium (6.01-12 years)	0.071333	0.107255	0.0858877	0.140483	0.0423824	0.0507363	0.0341528	0.0243631	0.365586	0.0269611	0.0255255	0.253921	0.295092	0.710904	0.0749164
45-54	Female	Rural	High (12.01+ years)	0.0790232	0.115411	0.0907322	0.15327	0.050952	0.0488735	0.0453642	0.0176892	0.386731	0.0173038	0.0267097	0.293679	0.183951	0.56037	0.0876785
45-54	Female	Rural	Low (0-6 years formal)	0.0694038	0.11298	0.0669213	0.110541	0.0439423	0.0294047	0.0337556	0.0198129	0.35976	0.0138677	0.0264442	0.195991	0.183257	0.55939	0.0610899
45-54	Female	Rural	Medium (6.01-12 years)	0.0705152	0.116238	0.0768406	0.128714	0.0463754	0.0360741	0.0376894	0.0198284	0.360858	0.017234	0.0264741	0.232363	0.189967	0.55978	0.069065
45-54	Female	Urban	High (12.01+ years)	0.0818833	0.112038	0.107416	0.185564	0.0508235	0.0652923	0.0485123	0.0189913	0.388924	0.0224078	0.0267458	0.353823	0.222596	0.672774	0.100907
45-54	Female	Urban	Low (0-6 years formal)	0.0722873	0.109798	0.0727668	0.126807	0.0438391	0.0382496	0.0359681	0.0208048	0.360597	0.0168379	0.0264607	0.225145	0.214117	0.672774	0.0704548
45-54	Female	Urban	Medium (6.01-12 years)	0.0730003	0.112921	0.0862328	0.151529	0.0462316	0.0468884	0.0402243	0.021081	0.361977	0.0216318	0.0265152	0.272927	0.224724	0.672774	0.0795129
45-54	Male	Rural	High (12.01+ years)	0.0795464	0.118186	0.0902982	0.138485	0.0472693	0.0496132	0.0424591	0.0194409	0.395214	0.0181382	0.0260691	0.27947	0.218081	0.582766	0.0868002
45-54	Male	Rural	Low (0-6 years formal)	0.0703453	0.115893	0.0676002	0.0987968	0.040688	0.0300223	0.031585	0.0218019	0.368899	0.0146378	0.0258116	0.187734	0.219189	0.581833	0.0607093
45-54	Male	Rural	Medium (6.01-12 years)	0.070993	0.118991	0.0771853	0.115348	0.0429751	0.0367994	0.03527	0.021783	0.368934	0.0180918	0.0258339	0.221998	0.226683	0.582208	0.0687381
45-54	Male	Urban	High (12.01+ years)	0.0820698	0.114616	0.10583	0.168408	0.0471482	0.0661397	0.0453077	0.0209613	0.396006	0.0234782	0.0260842	0.336162	0.262005	0.694889	0.0994245
45-54	Male	Urban	Low (0-6 years formal)	0.0732297	0.112392	0.0730751	0.113809	0.0405541	0.0389353	0.0336555	0.0229127	0.368933	0.0177605	0.0258184	0.214897	0.253705	0.694889	0.069993
45-54	Male	Urban	Medium (6.01-12 years)	0.0733206	0.115598	0.0859672	0.136713	0.0428515	0.0476738	0.0375752	0.0232044	0.369631	0.0227166	0.0258484	0.260258	0.2662	0.694889	0.0789414
55-64	Female	Rural	High (12.01+ years)	0.091721	0.105005	0.0973127	0.155239	0.0512246	0.0454684	0.0599051	0.0172927	0.446121	0.0147556	0.0266129	0.330515	0.169089	0.599269	0.0970745
55-64	Female	Rural	Low (0-6 years formal)	0.0784108	0.103115	0.0674609	0.112492	0.0440492	0.0274365	0.043611	0.0195053	0.408737	0.0118535	0.0263252	0.215835	0.169423	0.598209	0.0673831
55-64	Female	Rural	Medium (6.01-12 years)	0.0807827	0.106096	0.0790743	0.130743	0.0465227	0.0336227	0.0491065	0.0194311	0.411883	0.0146453	0.0263377	0.258077	0.175189	0.598629	0.076214
55-64	Female	Urban	High (12.01+ years)	0.0948198	0.101566	0.11993	0.186291	0.051103	0.0607934	0.0640389	0.0184722	0.450586	0.0191268	0.0266285	0.405145	0.20202	0.730285	0.112358
55-64	Female	Urban	Low (0-6 years formal)	0.0815752	0.0995663	0.0750199	0.128569	0.0439189	0.0358198	0.0465779	0.0203141	0.41069	0.0143027	0.0263106	0.250387	0.194993	0.730285	0.0779176
55-64	Female	Urban	Medium (6.01-12 years)	0.083834	0.102483	0.0915383	0.15314	0.0464229	0.0439453	0.0525551	0.0205367	0.41536	0.0184724	0.0264041	0.308004	0.20488	0.730285	0.0880557
55-64	Male	Rural	High (12.01+ years)	0.0917751	0.107671	0.0961382	0.140213	0.0475609	0.0462497	0.0562131	0.0190318	0.454308	0.0154912	0.0259773	0.314236	0.201644	0.619215	0.0960923
55-64	Male	Rural	Low (0-6 years formal)	0.0791653	0.105561	0.0680095	0.100537	0.0407568	0.0280745	0.0408819	0.021411	0.418038	0.0124746	0.025697	0.206387	0.202841	0.618209	0.0667462
55-64	Male	Rural	Medium (6.01-12 years)	0.0812621	0.108682	0.0791166	0.117318	0.0431104	0.0343666	0.0460343	0.0214072	0.420704	0.0154276	0.0257244	0.24656	0.209391	0.618612	0.075527
55-64	Male	Urban	High (12.01+ years)	0.0947868	0.104279	0.11731	0.169116	0.0474319	0.0617319	0.0601496	0.020323	0.457885	0.0200316	0.0259687	0.385726	0.239292	0.750385	0.110685
55-64	Male	Urban	Low (0-6 years formal)	0.0821696	0.102081	0.0749338	0.115428	0.0406498	0.0364491	0.0436491	0.0223184	0.419606	0.0150729	0.0256868	0.239239	0.232604	0.750385	0.0771678
55-64	Male	Urban	Medium (6.01-12 years)	0.083939	0.105151	0.0906409	0.138141	0.0430069	0.0445521	0.049189	0.0225496	0.422863	0.0194073	0.0257407	0.293385	0.24295	0.750385	0.0870448
65+	Female	Rural	High (12.01+ years)	0.132481	0.0804716	0.124985	0.164249	0.051892	0.0403227	0.115333	0.0169349	0.64926	0.0111023	0.0261611	0.450528	0.145643	0.768781	0.119629
65+	Female	Rural	Low (0-6 years formal)	0.107842	0.0787564	0.0740013	0.119282	0.0441781	0.0245508	0.0817207	0.0191077	0.57834	0.00882758	0.025846	0.278605	0.147844	0.767456	0.0834109
65+	Female	Rural	Medium (6.01-12 years)	0.1145	0.0808009	0.0919419	0.138715	0.0468369	0.0300253	0.0930765	0.0191116	0.589904	0.0111045	0.0258999	0.341937	0.151923	0.767979	0.0944383
65+	Female	Urban	High (12.01+ years)	0.137517	0.0779329	0.163888	0.195063	0.0517994	0.0542708	0.123593	0.0178129	0.663643	0.0145178	0.0261924	0.581407	0.170841	0.960892	0.142494
65+	Female	Urban	Low (0-6 years formal)	0.112295	0.075617	0.0877465	0.13607	0.0441583	0.0322515	0.0876501	0.0197329	0.587068	0.0108533	0.0258419	0.334113	0.167519	0.960892	0.0977358
65+	Female	Urban	Medium (6.01-12 years)	0.118709	0.0785103	0.115023	0.161705	0.0467516	0.0393406	0.0997227	0.0199035	0.600606	0.0139821	0.0259373	0.42428	0.174169	0.960892	0.109399
65+	Male	Rural	High (12.01+ years)	0.131553	0.0827737	0.121745	0.148235	0.0482313	0.0411865	0.10884	0.0186527	0.657593	0.0116555	0.0255599	0.429129	0.174734	0.784753	0.118247
65+	Male	Rural	Low (0-6 years formal)	0.107551	0.080563	0.0735972	0.106508	0.0409663	0.0250687	0.0771093	0.0210702	0.587518	0.00933111	0.0252452	0.265929	0.17808	0.783506	0.0829165
65+	Male	Rural	Medium (6.01-12 years)	0.114029	0.0835064	0.0906129	0.124524	0.0434359	0.0307128	0.0876481	0.0209725	0.598543	0.0116546	0.0252894	0.325809	0.18313	0.78399	0.0936297
65+	Male	Urban	High (12.01+ years)	0.135974	0.0798575	0.158554	0.176806	0.048133	0.0551762	0.116806	0.0195931	0.668587	0.0151556	0.0255655	0.551984	0.203564	0.976258	0.139714
65+	Male	Urban	Low (0-6 years formal)	0.111728	0.0782623	0.0864539	0.122056	0.0408909	0.0327484	0.0825412	0.0215684	0.594395	0.0113712	0.0252086	0.3181	0.199444	0.976258	0.0961664
65+	Male	Urban	Medium (6.01-12 years)	0.11798	0.080682	0.112104	0.145742	0.0433756	0.0400307	0.0939872	0.0218367	0.60712	0.0146765	0.0253103	0.403054	0.207665	0.976258	0.107773

## Sheet: Land use (M2 per 2000 kcal)
Age	Gender	Area	Education	Beans and legumes	Coffee	Eggs	Fruits	Non starchy vegetables	Nuts and seeds	Other starchy vegetables	Potatoes	Refined grains	Sugar	Tea	Dairy products	Processed meats	Unprocessed red meats	Whole grains
15-24	Female	Rural	High (12.01+ years)	0.34059	0.0346571	0.167135	0.181567	0.133287	0.0738214	0.0830928	0.0373569	1.01256	0.0285325	0.00534474	1.10419	0.784089	2.7218	0.156613
15-24	Female	Rural	Low (0-6 years formal)	0.284576	0.0331395	0.131492	0.121945	0.11065	0.0442446	0.0621374	0.0416745	0.916695	0.0249238	0.0053193	0.747238	0.754705	2.71509	0.109868
15-24	Female	Rural	Medium (6.01-12 years)	0.297361	0.0336798	0.147631	0.146193	0.118111	0.0545726	0.0694332	0.0416167	0.929633	0.0292965	0.00530471	0.88192	0.795136	2.71775	0.124976
15-24	Female	Urban	High (12.01+ years)	0.350237	0.0334021	0.189527	0.231784	0.1322	0.10031	0.0889343	0.0401874	1.03661	0.034422	0.00535886	1.3191	0.952155	3.26751	0.17605
15-24	Female	Urban	Low (0-6 years formal)	0.293621	0.0317999	0.139563	0.146181	0.109765	0.0589801	0.0661877	0.0436207	0.933564	0.0281381	0.00532542	0.852354	0.889373	3.26751	0.124344
15-24	Female	Urban	Medium (6.01-12 years)	0.305398	0.0323755	0.160789	0.180891	0.117181	0.0719997	0.0740823	0.0442816	0.946717	0.0344102	0.00531545	1.0288	0.949772	3.26751	0.140246
15-24	Male	Rural	High (12.01+ years)	0.341285	0.0352599	0.167792	0.165765	0.125771	0.0746743	0.0776158	0.0409766	1.02334	0.0301102	0.00520505	1.05461	0.916911	2.79962	0.155444
15-24	Male	Rural	Low (0-6 years formal)	0.288208	0.0337294	0.133446	0.110041	0.103947	0.0449188	0.0580751	0.0456572	0.929747	0.0264107	0.00518167	0.714937	0.889451	2.79322	0.109434
15-24	Male	Rural	Medium (6.01-12 years)	0.299725	0.0342905	0.149182	0.132724	0.111073	0.0553461	0.0648023	0.0457396	0.941508	0.03098	0.00516618	0.842698	0.93684	2.79574	0.124539
15-24	Male	Urban	High (12.01+ years)	0.351117	0.0339902	0.188611	0.212509	0.12466	0.101436	0.0830571	0.0441825	1.04593	0.0362447	0.0052184	1.25806	1.1076	3.3413	0.174889
15-24	Male	Urban	Low (0-6 years formal)	0.296395	0.0323793	0.141305	0.132751	0.103082	0.0597926	0.0618532	0.0481052	0.945696	0.0297578	0.0051868	0.81421	1.04514	3.3413	0.124112
15-24	Male	Urban	Medium (6.01-12 years)	0.307918	0.0329728	0.161672	0.165204	0.110162	0.0728958	0.0691634	0.0486304	0.958894	0.036282	0.00517839	0.983072	1.11335	3.3413	0.139423
25-34	Female	Rural	High (12.01+ years)	0.275219	0.0600689	0.160575	0.167842	0.138929	0.0756065	0.0621846	0.0350586	0.746045	0.0244477	0.00572549	0.904718	0.72345	2.30065	0.150528
25-34	Female	Rural	Low (0-6 years formal)	0.236874	0.0583802	0.126519	0.115072	0.116617	0.0446436	0.0466471	0.0391463	0.692119	0.0207429	0.0056841	0.614645	0.711542	2.29566	0.104786
25-34	Female	Rural	Medium (6.01-12 years)	0.242904	0.0597968	0.142071	0.136617	0.123976	0.0550471	0.0520275	0.0391109	0.694542	0.0248464	0.00567776	0.722495	0.742433	2.2976	0.118779
25-34	Female	Urban	High (12.01+ years)	0.283496	0.0577722	0.181839	0.211659	0.13793	0.10206	0.0664456	0.0376229	0.75564	0.0301668	0.00573673	1.07252	0.871105	2.74596	0.168916
25-34	Female	Urban	Low (0-6 years formal)	0.245784	0.0561031	0.134321	0.135784	0.115795	0.0593194	0.0497427	0.0411014	0.697784	0.0240309	0.00569415	0.698727	0.830419	2.74596	0.118806
25-34	Female	Urban	Medium (6.01-12 years)	0.250197	0.0574853	0.154422	0.166756	0.12314	0.0733871	0.0555517	0.0415924	0.701198	0.029855	0.00569349	0.838964	0.877592	2.74596	0.134706
25-34	Male	Rural	High (12.01+ years)	0.277734	0.0613829	0.16141	0.152731	0.130965	0.0765624	0.0580819	0.0386137	0.760252	0.025762	0.00557751	0.863555	0.851189	2.38377	0.149105
25-34	Male	Rural	Low (0-6 years formal)	0.240836	0.059674	0.128829	0.103378	0.109612	0.0456062	0.0436521	0.0431199	0.70816	0.022008	0.00554231	0.589681	0.842969	2.37899	0.104372
25-34	Male	Rural	Medium (6.01-12 years)	0.245623	0.0612675	0.143779	0.123448	0.116676	0.0560237	0.0486417	0.0430227	0.709167	0.0262404	0.00553078	0.692212	0.880364	2.38088	0.118407
25-34	Male	Urban	High (12.01+ years)	0.285499	0.0590255	0.181307	0.193612	0.129905	0.103158	0.0620926	0.0414945	0.76755	0.0317341	0.00559048	1.02363	1.02239	2.82118	0.167591
25-34	Male	Urban	Low (0-6 years formal)	0.249662	0.0573737	0.135969	0.122844	0.108756	0.0602311	0.0464912	0.0451972	0.711445	0.0253619	0.0055466	0.669071	0.976709	2.82118	0.118063
25-34	Male	Urban	Medium (6.01-12 years)	0.253133	0.0590442	0.155502	0.151724	0.115718	0.0743036	0.0518969	0.0458345	0.714696	0.0315074	0.00554344	0.802462	1.03819	2.82118	0.133688
35-44	Female	Rural	High (12.01+ years)	0.243816	0.0835441	0.155131	0.156624	0.13908	0.0727435	0.0547464	0.0327202	0.633863	0.0203143	0.00595089	0.816105	0.654622	2.01151	0.149043
35-44	Female	Rural	Low (0-6 years formal)	0.212955	0.081848	0.120527	0.1097	0.117504	0.0429478	0.0408721	0.0364737	0.593671	0.0167679	0.00589992	0.552832	0.651338	2.00752	0.103547
35-44	Female	Rural	Medium (6.01-12 years)	0.216201	0.0839341	0.135808	0.129025	0.124622	0.0530812	0.0456013	0.0365944	0.593643	0.0205057	0.00590464	0.651301	0.676634	2.00909	0.117244
35-44	Female	Urban	High (12.01+ years)	0.25202	0.0809416	0.177712	0.194227	0.138131	0.0991784	0.0584794	0.0349483	0.637973	0.0256788	0.00596737	0.971626	0.778489	2.40066	0.168117
35-44	Female	Urban	Low (0-6 years formal)	0.221497	0.0792522	0.128391	0.127425	0.116757	0.0570288	0.0435588	0.0382293	0.596042	0.0199307	0.00590924	0.628487	0.75249	2.40066	0.117341
35-44	Female	Urban	Medium (6.01-12 years)	0.222727	0.0812863	0.148563	0.154809	0.123831	0.0702042	0.0486402	0.0387039	0.595132	0.0251623	0.00591583	0.756331	0.79041	2.40066	0.132706
35-44	Male	Rural	High (12.01+ years)	0.246076	0.0854077	0.155622	0.141988	0.13102	0.0739461	0.0511132	0.0360446	0.647645	0.0214364	0.00580239	0.778962	0.775505	2.09071	0.14776
35-44	Male	Rural	Low (0-6 years formal)	0.216625	0.0837018	0.122386	0.0981596	0.110394	0.0437584	0.0382259	0.0402817	0.609889	0.0178055	0.00575437	0.530199	0.778724	2.08691	0.102822
35-44	Male	Rural	Medium (6.01-12 years)	0.218542	0.0857234	0.137336	0.116035	0.11721	0.0540039	0.0426342	0.0402508	0.608149	0.0216507	0.00575692	0.622244	0.805476	2.08842	0.116357
35-44	Male	Urban	High (12.01+ years)	0.253977	0.0826993	0.17668	0.177252	0.130072	0.100378	0.0546612	0.0386256	0.650657	0.026981	0.00581605	0.926919	0.919418	2.47578	0.16617
35-44	Male	Urban	Low (0-6 years formal)	0.225367	0.0810592	0.129714	0.114841	0.109658	0.0578465	0.0407124	0.0420577	0.609844	0.0210125	0.00575925	0.601162	0.887831	2.47578	0.116536
35-44	Male	Urban	Medium (6.01-12 years)	0.225778	0.0832779	0.149407	0.140357	0.116374	0.0714285	0.0454703	0.0425963	0.609562	0.026522	0.00576554	0.721734	0.937085	2.47578	0.131803
45-54	Female	Rural	High (12.01+ years)	0.253547	0.0896673	0.157127	0.152371	0.139607	0.0684065	0.0612459	0.0313561	0.643602	0.0170388	0.00602656	0.83736	0.59816	1.95572	0.157877
45-54	Female	Rural	Low (0-6 years formal)	0.218939	0.0877389	0.117469	0.108185	0.118098	0.040551	0.0451034	0.0351049	0.599981	0.0138498	0.00596606	0.559353	0.602024	1.95194	0.109119
45-54	Female	Rural	Medium (6.01-12 years)	0.223473	0.090295	0.134001	0.126565	0.125177	0.0498797	0.0505399	0.0351012	0.600793	0.0170822	0.00597348	0.661564	0.622536	1.95345	0.123385
45-54	Female	Urban	High (12.01+ years)	0.263	0.0870278	0.18469	0.186516	0.138687	0.0933371	0.0656554	0.0332789	0.647863	0.0217448	0.00604057	1.00893	0.702545	2.35996	0.179146
45-54	Female	Urban	Low (0-6 years formal)	0.228308	0.0852484	0.126898	0.124642	0.117352	0.0537444	0.0481569	0.036463	0.601607	0.0165895	0.00597539	0.640892	0.685363	2.35996	0.12404
45-54	Female	Urban	Medium (6.01-12 years)	0.23133	0.0877025	0.149343	0.150143	0.124344	0.0662092	0.0540588	0.0369418	0.602962	0.0211444	0.00598793	0.776107	0.717941	2.35996	0.140175
45-54	Male	Rural	High (12.01+ years)	0.255286	0.0918443	0.156914	0.138002	0.131288	0.0693765	0.0573328	0.0345066	0.65747	0.0179136	0.00587748	0.797524	0.709115	2.0282	0.156188
45-54	Male	Rural	Low (0-6 years formal)	0.222371	0.0900248	0.119063	0.0968039	0.110876	0.0413669	0.0421839	0.0386741	0.615192	0.0146772	0.00581857	0.536421	0.718213	2.0246	0.108362
45-54	Male	Rural	Medium (6.01-12 years)	0.225276	0.0924496	0.135062	0.113634	0.117593	0.0508516	0.0472971	0.0386459	0.614215	0.0179911	0.00582489	0.632994	0.741841	2.02605	0.122744
45-54	Male	Urban	High (12.01+ years)	0.26369	0.0890517	0.182564	0.169766	0.130391	0.0945522	0.0613195	0.0367493	0.659485	0.0228414	0.00588647	0.959198	0.829369	2.42867	0.176483
45-54	Male	Urban	Low (0-6 years formal)	0.23195	0.0872832	0.127857	0.112076	0.110094	0.0547044	0.0450429	0.0402189	0.615715	0.0175546	0.00582593	0.61255	0.812907	2.42867	0.123195
45-54	Male	Urban	Medium (6.01-12 years)	0.232957	0.0897894	0.149381	0.135792	0.116821	0.0673337	0.050474	0.0407064	0.615881	0.0222729	0.00583356	0.740966	0.850835	2.42867	0.139086
55-64	Female	Rural	High (12.01+ years)	0.296978	0.0815787	0.167944	0.153336	0.140901	0.0637085	0.08196	0.0307573	0.742116	0.0144981	0.00599974	0.942694	0.552499	2.1022	0.175064
55-64	Female	Rural	Low (0-6 years formal)	0.249207	0.0800855	0.118139	0.109566	0.118951	0.0378613	0.0589926	0.0346353	0.681177	0.0118027	0.00593446	0.615559	0.559985	2.09811	0.120584
55-64	Female	Rural	Medium (6.01-12 years)	0.25812	0.0824149	0.1375	0.127834	0.126175	0.046575	0.0666781	0.0345026	0.685311	0.0144819	0.00593783	0.734622	0.577276	2.09973	0.136409
55-64	Female	Urban	High (12.01+ years)	0.307203	0.0788849	0.205508	0.185731	0.140004	0.0871035	0.0878372	0.0324604	0.750293	0.0185209	0.00600907	1.15706	0.640848	2.57226	0.19974
55-64	Female	Urban	Low (0-6 years formal)	0.259469	0.0773125	0.130446	0.125634	0.118178	0.0503654	0.0631305	0.0357195	0.684942	0.0140581	0.00593579	0.713032	0.62825	2.57226	0.137409
55-64	Female	Urban	Medium (6.01-12 years)	0.268264	0.0795845	0.158021	0.150672	0.12543	0.0621519	0.0715078	0.036088	0.691806	0.0180128	0.00595793	0.876248	0.657938	2.57226	0.155431
55-64	Male	Rural	High (12.01+ years)	0.297253	0.083662	0.166477	0.138876	0.132678	0.0647439	0.0768593	0.0338895	0.755497	0.0152581	0.00585098	0.897499	0.659021	2.1647	0.173244
55-64	Male	Rural	Low (0-6 years formal)	0.251941	0.0819941	0.119514	0.0980457	0.11166	0.0387324	0.0552931	0.0380761	0.696433	0.0124692	0.00578807	0.589364	0.668172	2.16082	0.119355
55-64	Male	Rural	Medium (6.01-12 years)	0.260023	0.0844319	0.138055	0.114931	0.118573	0.0475511	0.0624989	0.0380636	0.699995	0.0153012	0.00579525	0.702623	0.688436	2.16238	0.135108
55-64	Male	Urban	High (12.01+ years)	0.307296	0.0810044	0.201652	0.169139	0.13178	0.0884106	0.0824282	0.0357763	0.762268	0.0194423	0.00585571	1.10254	0.761116	2.63394	0.196812
55-64	Male	Urban	Low (0-6 years formal)	0.262067	0.0792764	0.13076	0.113004	0.110954	0.0512412	0.0591444	0.0393029	0.699825	0.0148584	0.00579141	0.681988	0.747811	2.63394	0.136034
55-64	Male	Urban	Medium (6.01-12 years)	0.268973	0.0816711	0.157023	0.136257	0.117824	0.0629816	0.0669114	0.0397027	0.704277	0.0189754	0.00580437	0.835395	0.779891	2.63394	0.153623
65+	Female	Rural	High (12.01+ years)	0.438783	0.0626604	0.21385	0.160324	0.14464	0.0565055	0.16249	0.0302856	1.08038	0.0108816	0.00588784	1.28756	0.480372	2.7136	0.215314
65+	Female	Rural	Low (0-6 years formal)	0.349743	0.0613809	0.128666	0.115099	0.121192	0.0338843	0.11367	0.0340941	0.963839	0.00874748	0.00581744	0.794238	0.493756	2.70849	0.149674
65+	Female	Rural	Medium (6.01-12 years)	0.374726	0.0629076	0.158669	0.134174	0.1289	0.0415513	0.130028	0.0341047	0.981853	0.0109405	0.00583003	0.9735	0.505004	2.71051	0.169509
65+	Female	Urban	High (12.01+ years)	0.455647	0.0606597	0.278005	0.191631	0.143698	0.0778169	0.174468	0.0315226	1.10598	0.0140135	0.00590102	1.66766	0.54626	3.38719	0.253346
65+	Female	Urban	Low (0-6 years formal)	0.36467	0.0589063	0.151405	0.131461	0.12056	0.0453235	0.122222	0.0348813	0.979374	0.0106288	0.00582164	0.952338	0.54505	3.38719	0.172788
65+	Female	Urban	Medium (6.01-12 years)	0.387808	0.061125	0.197077	0.157012	0.128143	0.0556879	0.139682	0.0351783	1.00082	0.0135851	0.00584372	1.20969	0.564207	3.38719	0.193787
65+	Male	Rural	High (12.01+ years)	0.436131	0.064422	0.208989	0.145113	0.135965	0.0576801	0.153191	0.0333935	1.09358	0.0114515	0.00574841	1.22769	0.576417	2.7642	0.212864
65+	Male	Rural	Low (0-6 years formal)	0.348876	0.0627652	0.128435	0.10293	0.113708	0.0345507	0.107169	0.0376336	0.978609	0.0092773	0.00567739	0.758909	0.591066	2.75939	0.148826
65+	Male	Rural	Medium (6.01-12 years)	0.372541	0.0650221	0.156929	0.12071	0.121065	0.0424583	0.122366	0.0374861	0.995827	0.0115124	0.00568809	0.928861	0.607981	2.76126	0.168047
65+	Male	Urban	High (12.01+ years)	0.451101	0.0621445	0.269817	0.174304	0.134981	0.0790861	0.164759	0.0347321	1.11361	0.0146594	0.0057557	1.58399	0.653229	3.43676	0.248506
65+	Male	Urban	Low (0-6 years formal)	0.36287	0.0609706	0.149688	0.118226	0.112898	0.0460043	0.115021	0.0382169	0.991299	0.0111651	0.00567509	0.907634	0.647983	3.43676	0.170114
65+	Male	Urban	Medium (6.01-12 years)	0.38652	0.0628102	0.192651	0.141894	0.120252	0.0566121	0.131556	0.0386834	1.0114	0.0142931	0.00569891	1.15059	0.672412	3.43676	0.190867

## Sheet: Figure 2-relative deviation (%)
Type	Social-demographic Group	Region	Water Use	Land Use
per capita	Female, High level	Caribbean	10.143	7.30539
per capita	Female, Low level	Caribbean	-9.52781	-8.61375
per capita	Female, Medium level	Caribbean	-0.970356	-0.594912
per capita	Male, High level	Caribbean	10.4595	11.7194
per capita	Male, Low level	Caribbean	-8.06824	-8.16955
per capita	Male, Medium level	Caribbean	-2.03613	-1.6465
per capita	Female, High level	Central America	9.44116	8.42593
per capita	Female, Low level	Central America	-8.77288	-8.78778
per capita	Female, Medium level	Central America	-1.93961	-2.23423
per capita	Male, High level	Central America	9.93199	9.82081
per capita	Male, Low level	Central America	-7.59199	-6.73695
per capita	Male, Medium level	Central America	-1.06865	-0.48779
per capita	Female, High level	Central Asia	-1.38576	-2.44677
per capita	Female, Low level	Central Asia	-1.93121	-1.72182
per capita	Female, Medium level	Central Asia	-2.1687	-2.21009
per capita	Male, High level	Central Asia	1.53083	0.979692
per capita	Male, Low level	Central Asia	2.28878	3.1141
per capita	Male, Medium level	Central Asia	1.66605	2.2849
per capita	Female, High level	Eastern Africa	22.1255	21.8391
per capita	Female, Low level	Eastern Africa	-15.4199	-14.0815
per capita	Female, Medium level	Eastern Africa	-3.7598	-3.9949
per capita	Male, High level	Eastern Africa	16.9291	14.2523
per capita	Male, Low level	Eastern Africa	-15.65	-13.9607
per capita	Male, Medium level	Eastern Africa	-4.22483	-4.05441
per capita	Female, High level	Eastern Asia	4.78418	5.09548
per capita	Female, Low level	Eastern Asia	-0.74792	-0.439099
per capita	Female, Medium level	Eastern Asia	-6.0987	-11.4396
per capita	Male, High level	Eastern Asia	2.89741	4.8252
per capita	Male, Low level	Eastern Asia	-1.44258	0.0165947
per capita	Male, Medium level	Eastern Asia	0.607637	1.94142
per capita	Female, High level	Eastern Europe	0.995678	0.851306
per capita	Female, Low level	Eastern Europe	-4.41969	-5.48294
per capita	Female, Medium level	Eastern Europe	-2.56987	-3.33638
per capita	Male, High level	Eastern Europe	1.90587	3.31849
per capita	Male, Low level	Eastern Europe	1.40953	1.55102
per capita	Male, Medium level	Eastern Europe	2.6785	3.09851
per capita	Female, High level	Global	7.97121	6.54014
per capita	Female, Low level	Global	-7.49573	-7.03248
per capita	Female, Medium level	Global	-3.34568	-3.79899
per capita	Male, High level	Global	8.96711	8.26477
per capita	Male, Low level	Global	-5.34868	-3.46821
per capita	Male, Medium level	Global	-0.748274	-0.505248
per capita	Female, High level	Melanesia	4.39992	4.23776
per capita	Female, Low level	Melanesia	-2.62805	-1.82152
per capita	Female, Medium level	Melanesia	1.40086	1.56654
per capita	Male, High level	Melanesia	1.93688	1.28238
per capita	Male, Low level	Melanesia	-4.43746	-4.20448
per capita	Male, Medium level	Melanesia	-0.672146	-1.06067
per capita	Female, High level	Middle Africa	20.3337	17.9763
per capita	Female, Low level	Middle Africa	-15.8305	-13.8486
per capita	Female, Medium level	Middle Africa	-1.20082	-0.278854
per capita	Male, High level	Middle Africa	17.0321	14.4347
per capita	Male, Low level	Middle Africa	-16.6917	-15.2293
per capita	Male, Medium level	Middle Africa	-3.64281	-3.05425
per capita	Female, High level	Northern Africa	12.0801	11.7432
per capita	Female, Low level	Northern Africa	-5.33927	-5.53357
per capita	Female, Medium level	Northern Africa	-1.25278	-1.8453
per capita	Male, High level	Northern Africa	6.1083	5.57221
per capita	Male, Low level	Northern Africa	-4.66688	-4.37708
per capita	Male, Medium level	Northern Africa	-6.92947	-5.55944
per capita	Female, High level	Northern America	-5.44198	-8.38794
per capita	Female, Low level	Northern America	-5.44878	-7.28978
per capita	Female, Medium level	Northern America	-4.48326	-6.17591
per capita	Male, High level	Northern America	7.41048	9.14847
per capita	Male, Low level	Northern America	3.38801	5.59049
per capita	Male, Medium level	Northern America	4.57551	7.11466
per capita	Female, High level	Northern Europe	-2.92584	-5.13089
per capita	Female, Low level	Northern Europe	-5.28264	-6.08082
per capita	Female, Medium level	Northern Europe	-5.88728	-5.65806
per capita	Male, High level	Northern Europe	5.56583	7.01359
per capita	Male, Low level	Northern Europe	0.945022	2.49513
per capita	Male, Medium level	Northern Europe	7.5849	7.36107
per capita	Female, High level	Oceania	-0.524146	0.438169
per capita	Female, Low level	Oceania	-7.37113	-13.9919
per capita	Female, Medium level	Oceania	-8.47982	-14.9876
per capita	Male, High level	Oceania	11.1011	19.8968
per capita	Male, Low level	Oceania	3.10217	4.67718
per capita	Male, Medium level	Oceania	2.17185	3.96745
per capita	Female, High level	Polynesia	11.7892	9.2553
per capita	Female, Low level	Polynesia	-4.22951	-3.41605
per capita	Female, Medium level	Polynesia	3.86135	2.98771
per capita	Male, High level	Polynesia	3.22942	2.77892
per capita	Male, Low level	Polynesia	-11.004	-8.79098
per capita	Male, Medium level	Polynesia	-3.64646	-2.81491
per capita	Female, High level	South America	7.5741	4.8185
per capita	Female, Low level	South America	-9.62626	-9.59206
per capita	Female, Medium level	South America	-2.65243	-3.65655
per capita	Male, High level	South America	7.90915	6.17912
per capita	Male, Low level	South America	-8.32153	-7.39173
per capita	Male, Medium level	South America	5.11694	9.6427
per capita	Female, High level	South-eastern Asia	5.33723	5.79047
per capita	Female, Low level	South-eastern Asia	-3.22085	-3.91175
per capita	Female, Medium level	South-eastern Asia	2.21171	2.48896
per capita	Male, High level	South-eastern Asia	2.61338	3.04822
per capita	Male, Low level	South-eastern Asia	-6.90437	-7.50433
per capita	Male, Medium level	South-eastern Asia	-0.0371067	0.088417
per capita	Female, High level	Southern Africa	18.286	12.096
per capita	Female, Low level	Southern Africa	-7.46116	3.38076
per capita	Female, Medium level	Southern Africa	-2.6834	-2.092
per capita	Male, High level	Southern Africa	14.3632	7.06233
per capita	Male, Low level	Southern Africa	-16.5348	-13.8193
per capita	Male, Medium level	Southern Africa	-5.96985	-6.62788
per capita	Female, High level	Southern Asia	5.94563	6.52037
per capita	Female, Low level	Southern Asia	-8.60982	-8.42085
per capita	Female, Medium level	Southern Asia	-5.09481	-3.56487
per capita	Male, High level	Southern Asia	10.2449	9.17697
per capita	Male, Low level	Southern Asia	-3.69532	-3.28868
per capita	Male, Medium level	Southern Asia	1.20941	-0.42294
per capita	Female, High level	Southern Europe	-0.795549	-2.04091
per capita	Female, Low level	Southern Europe	-3.04915	-3.49396
per capita	Female, Medium level	Southern Europe	-2.77692	-3.56924
per capita	Male, High level	Southern Europe	3.69635	5.24207
per capita	Male, Low level	Southern Europe	0.513897	0.856827
per capita	Male, Medium level	Southern Europe	2.41137	3.00519
per capita	Female, High level	Western Africa	19.157	16.1694
per capita	Female, Low level	Western Africa	-14.7904	-12.731
per capita	Female, Medium level	Western Africa	0.0091632	1.40203
per capita	Male, High level	Western Africa	18.9716	16.8086
per capita	Male, Low level	Western Africa	-18.9629	-17.8099
per capita	Male, Medium level	Western Africa	-4.38446	-3.83911
per capita	Female, High level	Western Asia	1.71577	0.348521
per capita	Female, Low level	Western Asia	-5.07909	-5.09198
per capita	Female, Medium level	Western Asia	-1.55588	-2.0579
per capita	Male, High level	Western Asia	5.16914	5.13802
per capita	Male, Low level	Western Asia	-1.63412	-0.609713
per capita	Male, Medium level	Western Asia	1.38419	2.27305
per capita	Female, High level	Western Europe	-2.48214	-4.06792
per capita	Female, Low level	Western Europe	-7.4547	-9.90532
per capita	Female, Medium level	Western Europe	-4.92299	-5.75631
per capita	Male, High level	Western Europe	7.71093	9.06426
per capita	Male, Low level	Western Europe	1.63871	3.28627
per capita	Male, Medium level	Western Europe	5.5102	7.379
total population	Female, High level	Caribbean	-49.6976	-51.7399
total population	Female, Low level	Caribbean	4.11982	-0.26821
total population	Female, Medium level	Caribbean	48.9365	52.5625
total population	Male, High level	Caribbean	-53.5467	-53.6985
total population	Male, Low level	Caribbean	-2.68614	-6.65872
total population	Male, Medium level	Caribbean	52.8742	59.8029
total population	Female, High level	Central America	-57.6972	-57.7566
total population	Female, Low level	Central America	20.3839	16.6135
total population	Female, Medium level	Central America	51.2503	53.1254
total population	Male, High level	Central America	-60.1764	-60.0306
total population	Male, Low level	Central America	-1.7566	-3.00807
total population	Male, Medium level	Central America	47.996	51.0564
total population	Female, High level	Central Asia	-53.5381	-53.5555
total population	Female, Low level	Central Asia	-12.4917	-15.8592
total population	Female, Medium level	Central Asia	63.7611	65.4071
total population	Male, High level	Central Asia	-54.6311	-53.9482
total population	Male, Low level	Central Asia	-18.1633	-19.5048
total population	Male, Medium level	Central Asia	75.0631	77.4607
total population	Female, High level	Eastern Africa	-60.413	-61.4721
total population	Female, Low level	Eastern Africa	103.151	102.868
total population	Female, Medium level	Eastern Africa	-23.9304	-22.5552
total population	Male, High level	Eastern Africa	-65.2887	-65.4682
total population	Male, Low level	Eastern Africa	66.9112	65.8124
total population	Male, Medium level	Eastern Africa	-20.4299	-19.1849
total population	Female, High level	Eastern Asia	-70.8561	-71.3747
total population	Female, Low level	Eastern Asia	0.158212	-2.86334
total population	Female, Medium level	Eastern Asia	51.0018	52.5793
total population	Male, High level	Eastern Asia	-59.6804	-60.0614
total population	Male, Low level	Eastern Asia	-20.1168	-22.3826
total population	Male, Medium level	Eastern Asia	99.4933	104.103
total population	Female, High level	Eastern Europe	47.6722	52.7105
total population	Female, Low level	Eastern Europe	-59.111	-63.6082
total population	Female, Medium level	Eastern Europe	25.3106	23.836
total population	Male, High level	Eastern Europe	14.0768	18.7325
total population	Male, Low level	Eastern Europe	-66.5101	-69.6441
total population	Male, Medium level	Eastern Europe	38.5615	37.9733
total population	Female, High level	Global	-43.358	-42.9562
total population	Female, Low level	Global	8.45922	5.41143
total population	Female, Medium level	Global	38.0359	40.6891
total population	Male, High level	Global	-44.5626	-44.597
total population	Male, Low level	Global	-13.907	-16.6505
total population	Male, Medium level	Global	55.3324	58.1032
total population	Female, High level	Melanesia	-72.5227	-73.0704
total population	Female, Low level	Melanesia	96.069	97.507
total population	Female, Medium level	Melanesia	-21.0165	-21.2358
total population	Male, High level	Melanesia	-70.2594	-71.1298
total population	Male, Low level	Melanesia	74.4701	75.3516
total population	Male, Medium level	Melanesia	-6.7405	-7.4226
total population	Female, High level	Middle Africa	-65.1214	-66.6563
total population	Female, Low level	Middle Africa	67.4249	72.8284
total population	Female, Medium level	Middle Africa	17.1801	13.0702
total population	Male, High level	Middle Africa	-60.3064	-61.5053
total population	Male, Low level	Middle Africa	7.32858	12.2807
total population	Male, Medium level	Middle Africa	33.4942	29.9823
total population	Female, High level	Northern Africa	-56.0628	-56.3618
total population	Female, Low level	Northern Africa	47.2933	45.4561
total population	Female, Medium level	Northern Africa	22.4475	22.9775
total population	Male, High level	Northern Africa	-52.7975	-52.964
total population	Male, Low level	Northern Africa	8.21339	8.04352
total population	Male, Medium level	Northern Africa	30.9061	32.8486
total population	Female, High level	Northern America	21.2896	18.1901
total population	Female, Low level	Northern America	-86.9251	-87.1889
total population	Female, Medium level	Northern America	57.1314	54.9078
total population	Male, High level	Northern America	23.9645	25.3041
total population	Male, Low level	Northern America	-85.1898	-84.9151
total population	Male, Medium level	Northern America	69.7294	73.702
total population	Female, High level	Northern Europe	-4.71654	-8.67167
total population	Female, Low level	Northern Europe	-64.4852	-63.2063
total population	Female, Medium level	Northern Europe	66.0445	63.5795
total population	Male, High level	Northern Europe	-9.63612	-11.0675
total population	Male, Low level	Northern Europe	-64.5694	-62.0431
total population	Male, Medium level	Northern Europe	77.3628	81.4091
total population	Female, High level	Oceania	-56.748	-58.951
total population	Female, Low level	Oceania	-28.8881	-32.6804
total population	Female, Medium level	Oceania	53.5228	47.0246
total population	Male, High level	Oceania	-51.0268	-49.5339
total population	Male, Low level	Oceania	-15.4357	-13.0573
total population	Male, Medium level	Oceania	98.5757	107.198
total population	Female, High level	Polynesia	-46.4745	-47.8237
total population	Female, Low level	Polynesia	37.364	34.1119
total population	Female, Medium level	Polynesia	26.6676	28.0972
total population	Male, High level	Polynesia	-62.0895	-62.3578
total population	Male, Low level	Polynesia	47.2023	47.8707
total population	Male, Medium level	Polynesia	-2.66986	0.101691
total population	Female, High level	South America	-54.2602	-55.1002
total population	Female, Low level	South America	-9.34147	-10.0025
total population	Female, Medium level	South America	65.4026	64.6596
total population	Male, High level	South America	-58.4807	-58.5487
total population	Male, Low level	South America	-13.6356	-13.2947
total population	Male, Medium level	South America	70.3155	72.2866
total population	Female, High level	South-eastern Asia	-45.4802	-45.5757
total population	Female, Low level	South-eastern Asia	15.8056	14.8332
total population	Female, Medium level	South-eastern Asia	43.3873	45.2107
total population	Male, High level	South-eastern Asia	-54.7879	-55.0551
total population	Male, Low level	South-eastern Asia	-6.23865	-7.51992
total population	Male, Medium level	South-eastern Asia	47.3139	48.1068
total population	Female, High level	Southern Africa	-47.5537	-49.5074
total population	Female, Low level	Southern Africa	-18.706	-17.1071
total population	Female, Medium level	Southern Africa	104.802	107.031
total population	Male, High level	Southern Africa	-61.138	-63.2677
total population	Male, Low level	Southern Africa	-41.1433	-40.7969
total population	Male, Medium level	Southern Africa	63.7387	63.6486
total population	Female, High level	Southern Asia	-52.2665	-49.5104
total population	Female, Low level	Southern Asia	35.7187	39.6402
total population	Female, Medium level	Southern Asia	23.2635	23.6321
total population	Male, High level	Southern Asia	-46.801	-47.2576
total population	Male, Low level	Southern Asia	0.305518	-1.64004
total population	Male, Medium level	Southern Asia	39.7797	35.1358
total population	Female, High level	Southern Europe	-39.9212	-40.5955
total population	Female, Low level	Southern Europe	-20.8799	-21.791
total population	Female, Medium level	Southern Europe	55.0324	54.4247
total population	Male, High level	Southern Europe	-43.6598	-43.6048
total population	Male, Low level	Southern Europe	-30.824	-30.7322
total population	Male, Medium level	Southern Europe	80.2524	82.2989
total population	Female, High level	Western Africa	-55.6281	-55.9537
total population	Female, Low level	Western Africa	68.892	72.3645
total population	Female, Medium level	Western Africa	5.81412	4.58959
total population	Male, High level	Western Africa	-50.6553	-52.1781
total population	Male, Low level	Western Africa	17.6426	19.886
total population	Male, Medium level	Western Africa	13.9347	11.2916
total population	Female, High level	Western Asia	-50.6508	-50.8264
total population	Female, Low level	Western Asia	31.9784	33.3748
total population	Female, Medium level	Western Asia	26.9673	24.728
total population	Male, High level	Western Asia	-52.1179	-51.5584
total population	Male, Low level	Western Asia	2.84544	4.08529
total population	Male, Medium level	Western Asia	40.9775	40.1967
total population	Female, High level	Western Europe	-26.7336	-28.7233
total population	Female, Low level	Western Europe	-70.9451	-72.1551
total population	Female, Medium level	Western Europe	84.8078	82.9901
total population	Male, High level	Western Europe	-15.8321	-15.1272
total population	Male, Low level	Western Europe	-73.0754	-72.9676
total population	Male, Medium level	Western Europe	101.778	105.983
per capita	Age 15-34	Caribbean	10.8253	11.0822
per capita	Age 15-34	Central America	12.4401	15.171
per capita	Age 15-34	Central Asia	11.7566	14.9832
per capita	Age 15-34	Eastern Africa	-5.5438	-9.4508
per capita	Age 15-34	Eastern Asia	12.6313	14.3016
per capita	Age 15-34	Eastern Europe	11.2573	12.6936
per capita	Age 15-34	Global	5.78908	5.36742
per capita	Age 15-34	Melanesia	18.1751	20.1927
per capita	Age 15-34	Middle Africa	-5.71927	-9.01917
per capita	Age 15-34	Northern Africa	10.7451	11.8784
per capita	Age 15-34	Northern America	-4.17912	1.90522
per capita	Age 15-34	Northern Europe	2.08074	6.04643
per capita	Age 15-34	Oceania	-0.78437	5.28813
per capita	Age 15-34	Polynesia	7.84054	14.9781
per capita	Age 15-34	South America	12.344	12.7915
per capita	Age 15-34	South-eastern Asia	17.8419	25.277
per capita	Age 15-34	Southern Africa	-6.02421	-7.08134
per capita	Age 15-34	Southern Asia	1.93114	6.94718
per capita	Age 15-34	Southern Europe	4.23488	6.38231
per capita	Age 15-34	Western Africa	-1.08186	-2.75021
per capita	Age 15-34	Western Asia	9.21783	11.2506
per capita	Age 15-34	Western Europe	-2.78155	2.75207
per capita	Age 35-54	Caribbean	-14.9871	-15.7267
per capita	Age 35-54	Central America	-14.7637	-16.47
per capita	Age 35-54	Central Asia	-2.30414	-2.23014
per capita	Age 35-54	Eastern Africa	-26.3711	-28.5662
per capita	Age 35-54	Eastern Asia	-2.91268	-3.84132
per capita	Age 35-54	Eastern Europe	-2.29805	-4.20169
per capita	Age 35-54	Global	-11.2533	-12.4547
per capita	Age 35-54	Melanesia	-4.8543	-5.81577
per capita	Age 35-54	Middle Africa	-28.4538	-30.1367
per capita	Age 35-54	Northern Africa	-11.0946	-13.1562
per capita	Age 35-54	Northern America	4.35494	2.34088
per capita	Age 35-54	Northern Europe	1.80074	-1.01617
per capita	Age 35-54	Oceania	4.86453	6.1818
per capita	Age 35-54	Polynesia	-9.47462	-8.8039
per capita	Age 35-54	South America	-15.3349	-16.0114
per capita	Age 35-54	South-eastern Asia	-6.79899	-9.14755
per capita	Age 35-54	Southern Africa	-26.0267	-25.1934
per capita	Age 35-54	Southern Asia	-9.72483	-10.1572
per capita	Age 35-54	Southern Europe	0.511354	-0.361135
per capita	Age 35-54	Western Africa	-25.5681	-26.5619
per capita	Age 35-54	Western Asia	-5.64748	-7.29008
per capita	Age 35-54	Western Europe	3.27537	1.12476
per capita	Age 55+	Caribbean	4.16181	4.64459
per capita	Age 55+	Central America	2.32368	1.29899
per capita	Age 55+	Central Asia	-9.45246	-12.753
per capita	Age 55+	Eastern Africa	31.9149	38.017
per capita	Age 55+	Eastern Asia	-9.71865	-10.4603
per capita	Age 55+	Eastern Europe	-8.95922	-8.49191
per capita	Age 55+	Global	5.4642	7.08726
per capita	Age 55+	Melanesia	-13.3208	-14.3769
per capita	Age 55+	Middle Africa	34.1731	39.1559
per capita	Age 55+	Northern Africa	0.349481	1.27774
per capita	Age 55+	Northern America	-0.17581	-4.2461
per capita	Age 55+	Northern Europe	-3.88148	-5.03026
per capita	Age 55+	Oceania	-4.08016	-11.4699
per capita	Age 55+	Polynesia	1.63408	-6.17422
per capita	Age 55+	South America	2.99086	3.21994
per capita	Age 55+	South-eastern Asia	-11.0429	-16.1294
per capita	Age 55+	Southern Africa	32.0509	32.2747
per capita	Age 55+	Southern Asia	7.79368	3.21007
per capita	Age 55+	Southern Europe	-4.74622	-6.02117
per capita	Age 55+	Western Africa	26.65	29.3121
per capita	Age 55+	Western Asia	-3.57035	-3.96053
per capita	Age 55+	Western Europe	-0.493821	-3.87683
total population	Age 15-34	Caribbean	35.4232	30.9839
total population	Age 15-34	Central America	52.3311	52.7336
total population	Age 15-34	Central Asia	21.9467	24.1367
total population	Age 15-34	Eastern Africa	65.0643	62.3315
total population	Age 15-34	Eastern Asia	7.10724	12.4582
total population	Age 15-34	Eastern Europe	7.87886	9.00231
total population	Age 15-34	Global	29.4096	31.6186
total population	Age 15-34	Melanesia	62.6093	66.1429
total population	Age 15-34	Middle Africa	74.7416	71.0652
total population	Age 15-34	Northern Africa	66.6244	67.5399
total population	Age 15-34	Northern America	-1.75547	2.84476
total population	Age 15-34	Northern Europe	-10.078	-3.35255
total population	Age 15-34	Oceania	-0.514005	3.11823
total population	Age 15-34	Polynesia	64.5845	71.0091
total population	Age 15-34	South America	32.9362	32.7082
total population	Age 15-34	South-eastern Asia	34.2991	38.5913
total population	Age 15-34	Southern Africa	43.4639	42.2302
total population	Age 15-34	Southern Asia	41.8558	49.0887
total population	Age 15-34	Southern Europe	-19.0863	-16.985
total population	Age 15-34	Western Africa	59.8879	56.0323
total population	Age 15-34	Western Asia	56.3086	60.8656
total population	Age 15-34	Western Europe	-17.5218	-12.6892
total population	Age 35-54	Caribbean	-12.3358	-10.5625
total population	Age 35-54	Central America	-15.9297	-16.2292
total population	Age 35-54	Central Asia	8.27069	8.5932
total population	Age 35-54	Eastern Africa	-34.6778	-34.7804
total population	Age 35-54	Eastern Asia	20.3198	20.4449
total population	Age 35-54	Eastern Europe	6.81793	5.15414
total population	Age 35-54	Global	-3.9188	-4.45709
total population	Age 35-54	Melanesia	-7.56668	-9.57478
total population	Age 35-54	Middle Africa	-33.3643	-33.6478
total population	Age 35-54	Northern Africa	-21.2023	-23.0325
total population	Age 35-54	Northern America	0.305662	-1.12677
total population	Age 35-54	Northern Europe	6.54574	4.20445
total population	Age 35-54	Oceania	19.0014	18.2902
total population	Age 35-54	Polynesia	-23.425	-24.6435
total population	Age 35-54	South America	-8.45788	-8.72087
total population	Age 35-54	South-eastern Asia	3.47245	1.54917
total population	Age 35-54	Southern Africa	-24.2023	-23.6299
total population	Age 35-54	Southern Asia	-14.8079	-17.0409
total population	Age 35-54	Southern Europe	12.6042	12.1796
total population	Age 35-54	Western Africa	-31.3244	-31.7449
total population	Age 35-54	Western Asia	-14.6939	-17.5669
total population	Age 35-54	Western Europe	5.13358	3.70224
total population	Age 55+	Caribbean	-23.0874	-20.4214
total population	Age 55+	Central America	-36.4015	-36.5044
total population	Age 55+	Central Asia	-30.2174	-32.7299
total population	Age 55+	Eastern Africa	-30.3865	-27.5511
total population	Age 55+	Eastern Asia	-27.4271	-32.9031
total population	Age 55+	Eastern Europe	-14.6968	-14.1564
total population	Age 55+	Global	-25.4908	-27.1615
total population	Age 55+	Melanesia	-55.0427	-56.5682
total population	Age 55+	Middle Africa	-41.3773	-37.4173
total population	Age 55+	Northern Africa	-45.4221	-44.5074
total population	Age 55+	Northern America	1.4498	-1.718
total population	Age 55+	Northern Europe	3.53228	-0.851906
total population	Age 55+	Oceania	-18.4874	-21.4084
total population	Age 55+	Polynesia	-41.1595	-46.3657
total population	Age 55+	South America	-24.4783	-23.9873
total population	Age 55+	South-eastern Asia	-37.7715	-40.1405
total population	Age 55+	Southern Africa	-19.2617	-18.6003
total population	Age 55+	Southern Asia	-27.0479	-32.0478
total population	Age 55+	Southern Europe	6.48215	4.80535
total population	Age 55+	Western Africa	-28.5636	-24.2874
total population	Age 55+	Western Asia	-41.6147	-43.2987
total population	Age 55+	Western Europe	12.3882	8.98694
per capita	Rural	Caribbean	-7.511	-8.0001
per capita	Urban	Caribbean	7.511	8.00009
per capita	Rural	Central America	-8.2618	-9.03898
per capita	Urban	Central America	8.2618	9.03898
per capita	Rural	Central Asia	-2.21349	-3.24514
per capita	Urban	Central Asia	2.21349	3.24514
per capita	Rural	Eastern Africa	-12.0533	-13.4192
per capita	Urban	Eastern Africa	12.0533	13.4192
per capita	Rural	Eastern Asia	-2.49244	-2.97286
per capita	Urban	Eastern Asia	2.49244	2.97286
per capita	Rural	Eastern Europe	-2.03275	-2.45006
per capita	Urban	Eastern Europe	2.03275	2.45006
per capita	Rural	Global	-6.21461	-6.90379
per capita	Urban	Global	6.21461	6.90379
per capita	Rural	Melanesia	-3.40085	-3.57703
per capita	Urban	Melanesia	3.40085	3.57703
per capita	Rural	Middle Africa	-13.9325	-14.6625
per capita	Urban	Middle Africa	13.9325	14.6625
per capita	Rural	Northern Africa	-5.2282	-6.23773
per capita	Urban	Northern Africa	5.2282	6.23774
per capita	Rural	Northern America	1.18561	0.78346
per capita	Urban	Northern America	-1.18562	-0.78346
per capita	Rural	Northern Europe	-0.388247	-0.452692
per capita	Urban	Northern Europe	0.388247	0.452683
per capita	Rural	Oceania	0.643168	0.139878
per capita	Urban	Oceania	-0.643168	-0.139878
per capita	Rural	Polynesia	-4.9134	-4.47058
per capita	Urban	Polynesia	4.9134	4.47058
per capita	Rural	South America	-9.38415	-9.84038
per capita	Urban	South America	9.38416	9.84038
per capita	Rural	South-eastern Asia	-2.76138	-3.11716
per capita	Urban	South-eastern Asia	2.76138	3.11716
per capita	Rural	Southern Africa	-13.7239	-14.9718
per capita	Urban	Southern Africa	13.7239	14.9718
per capita	Rural	Southern Asia	-5.40942	-8.60055
per capita	Urban	Southern Asia	5.40942	8.60056
per capita	Rural	Southern Europe	-0.860245	-1.29859
per capita	Urban	Southern Europe	0.860237	1.29858
per capita	Rural	Western Africa	-12.6844	-13.8027
per capita	Urban	Western Africa	12.6844	13.8027
per capita	Rural	Western Asia	-5.30373	-6.2357
per capita	Urban	Western Asia	5.30374	6.2357
per capita	Rural	Western Europe	1.4037	1.29195
per capita	Urban	Western Europe	-1.4037	-1.29196
total population	Rural	Caribbean	-66.3178	-66.4275
total population	Urban	Caribbean	66.3178	66.4275
total population	Rural	Central America	-55.2358	-57.0045
total population	Urban	Central America	55.2358	57.0045
total population	Rural	Central Asia	-57.6676	-59.6316
total population	Urban	Central Asia	57.6676	59.6316
total population	Rural	Eastern Africa	-36.1751	-38.2333
total population	Urban	Eastern Africa	36.1751	38.2333
total population	Rural	Eastern Asia	-54.1235	-53.5704
total population	Urban	Eastern Asia	54.1235	53.5704
total population	Rural	Eastern Europe	-45.209	-47.0557
total population	Urban	Eastern Europe	45.209	47.0557
total population	Rural	Global	-56.0774	-56.6892
total population	Urban	Global	56.0774	56.6892
total population	Rural	Melanesia	37.8262	38.2124
total population	Urban	Melanesia	-37.8262	-38.2124
total population	Rural	Middle Africa	-48.571	-46.9084
total population	Urban	Middle Africa	48.571	46.9084
total population	Rural	Northern Africa	-62.773	-63.4552
total population	Urban	Northern Africa	62.773	63.4552
total population	Rural	Northern America	-43.8742	-44.2851
total population	Urban	Northern America	43.8742	44.2851
total population	Rural	Northern Europe	-49.5125	-48.4677
total population	Urban	Northern Europe	49.5125	48.4677
total population	Rural	Oceania	-57.3594	-58.5997
total population	Urban	Oceania	57.3594	58.5996
total population	Rural	Polynesia	-27.0129	-26.5333
total population	Urban	Polynesia	27.0129	26.5333
total population	Rural	South America	-62.2428	-62.7001
total population	Urban	South America	62.2428	62.7001
total population	Rural	South-eastern Asia	-54.5152	-54.6137
total population	Urban	South-eastern Asia	54.5152	54.6137
total population	Rural	Southern Africa	-63.6225	-64.7846
total population	Urban	Southern Africa	63.6225	64.7846
total population	Rural	Southern Asia	-64.4337	-65.9079
total population	Urban	Southern Asia	64.4337	65.9079
total population	Rural	Southern Europe	-38.491	-38.6085
total population	Urban	Southern Europe	38.491	38.6085
total population	Rural	Western Africa	-53.4936	-55.5797
total population	Urban	Western Africa	53.4935	55.5797
total population	Rural	Western Asia	-68.7732	-68.778
total population	Urban	Western Asia	68.7732	68.778
total population	Rural	Western Europe	-36.1154	-36.7526
total population	Urban	Western Europe	36.1154	36.7526
